# Supplementary material for: Trends and risk factors of mortality and disability adjusted life years for chronic respiratory diseases from 1990 to 2017: systematic analysis for the Global Burden of Disease Study 2017
Source: PubMed Central journal article supplement — BMJ. 2020 Feb 19;368:m234. doi: 10.1136/bmj.m234 (PMC7190065; doi:10.1136/bmj.m234), 2020-02-19
Supplement: lix052342.ww.pdf [file lix052342.ww.pdf]

**Trends and risk factors of mortality and disability-adjusted life year for chronic  
respiratory diseases from 1990 to 2017: systematic analysis for the Global  
Burden of Disease Study 2017**

Xiaochen Li; Xiaopei Cao; Mingzhou Guo; Min Xie; Xiansheng Liu

**Table of contents**

|                              |       |
|------------------------------|-------|
| Supplemental Figure 1 .....  | 2     |
| Supplemental Figure 2 .....  | 3     |
| Supplemental Figure 3 .....  | 4     |
| Supplemental Figure 4 .....  | 5     |
| Supplemental Figure 5 .....  | 6     |
| Supplemental Figure 6 .....  | 7     |
| Supplemental Figure 7 .....  | 8     |
| Supplemental Figure 8 .....  | 9     |
| Supplemental Figure 9 .....  | 10    |
| Supplemental Figure 10 ..... | 11    |
| Supplemental Figure 11 ..... | 12    |
| Supplemental Figure 12 ..... | 13    |
| Supplemental Figure 13 ..... | 14    |
| Supplemental Figure 14 ..... | 15    |
| Supplemental Figure 15 ..... | 16    |
| Supplemental Table 1 .....   | 17    |
| Supplemental Table 2 .....   | 18-19 |
| Supplemental Table 3 .....   | 20-28 |
| Supplemental material .....  | 29-48 |



The global mortality rate of pneumoconiosis for both sexes in 195 countries and territories.

a. The age-standardized mortality rate (ASMR) of pneumoconiosis for both sexes combined in 2017.

b. The relative percentage change in the ASMR of pneumoconiosis for both sexes between 1990 and 2017.

c. The estimated annual percentage change (EAPC) in the ASMR of pneumoconiosis for both sexes from 1990 to 2017.

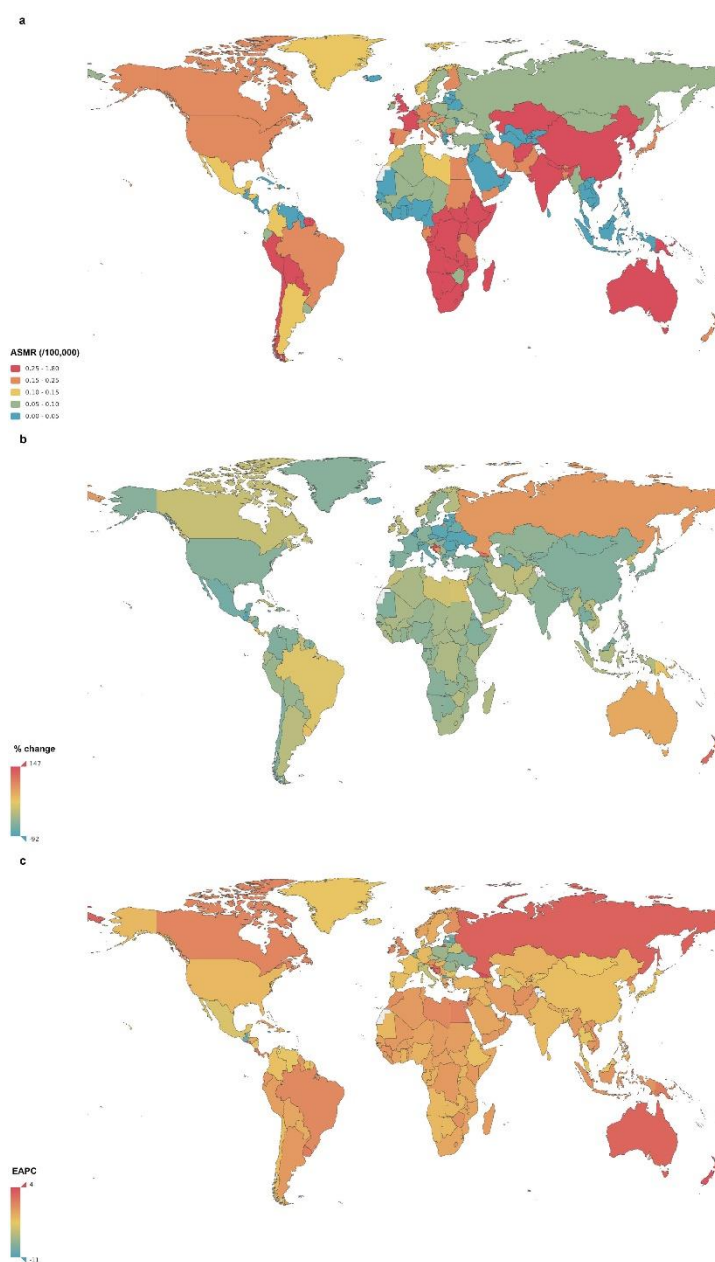

Supplemental Figure 3

The global mortality rate of asthma for both sexes in 195 countries and territories.

a. The age-standardized mortality rate (ASMR) of asthma for both sexes combined in 2017.

b. The relative percentage change in the ASMR of asthma for both sexes between 1990 and 2017.

c. The estimated annual percentage change (EAPC) in the ASMR of asthma for both sexes from 1990 to 2017.

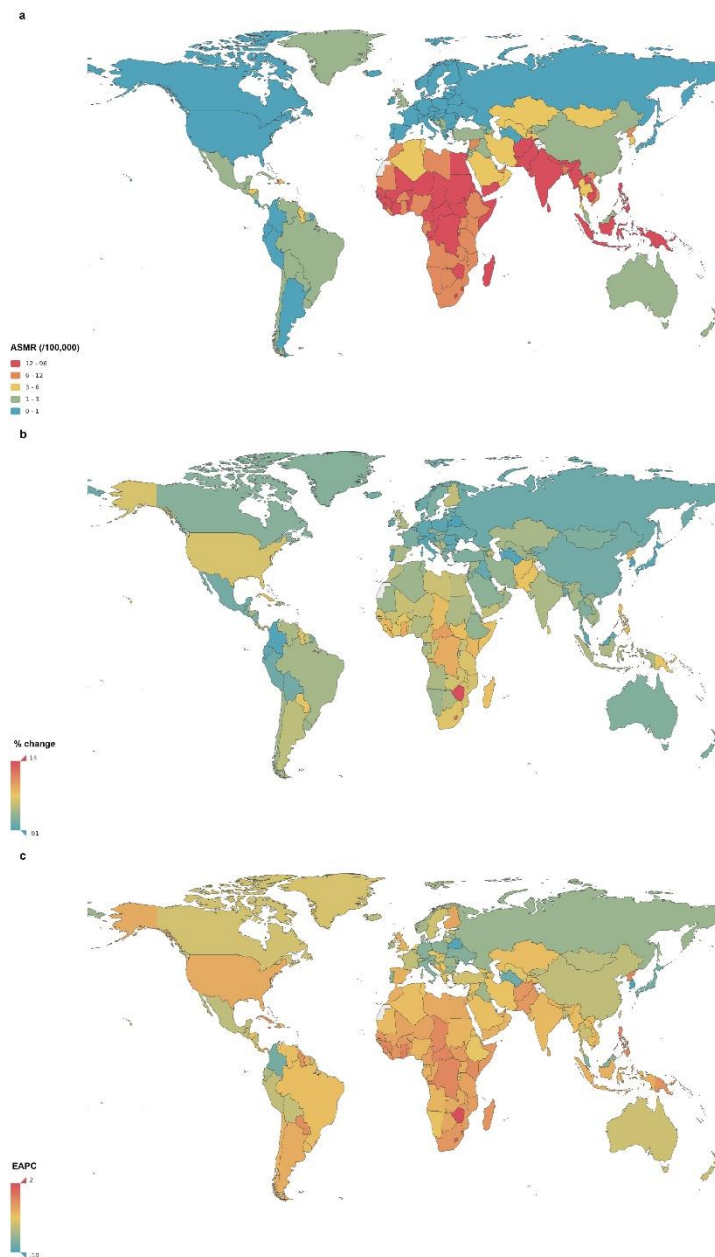

Supplemental Figure 4

The global mortality rate of interstitial lung disease and pulmonary sarcoidosis for both sexes in 195 countries and territories.

a. The age-standardized mortality rate (ASMR) of interstitial lung disease and pulmonary sarcoidosis for both sexes combined in 2017.

b. The relative percentage change in the ASMR of interstitial lung disease and pulmonary sarcoidosis for both sexes between 1990 and 2017.

c. The estimated annual percentage change (EAPC) in the ASMR of interstitial lung disease and pulmonary sarcoidosis for both sexes from 1990 to 2017.

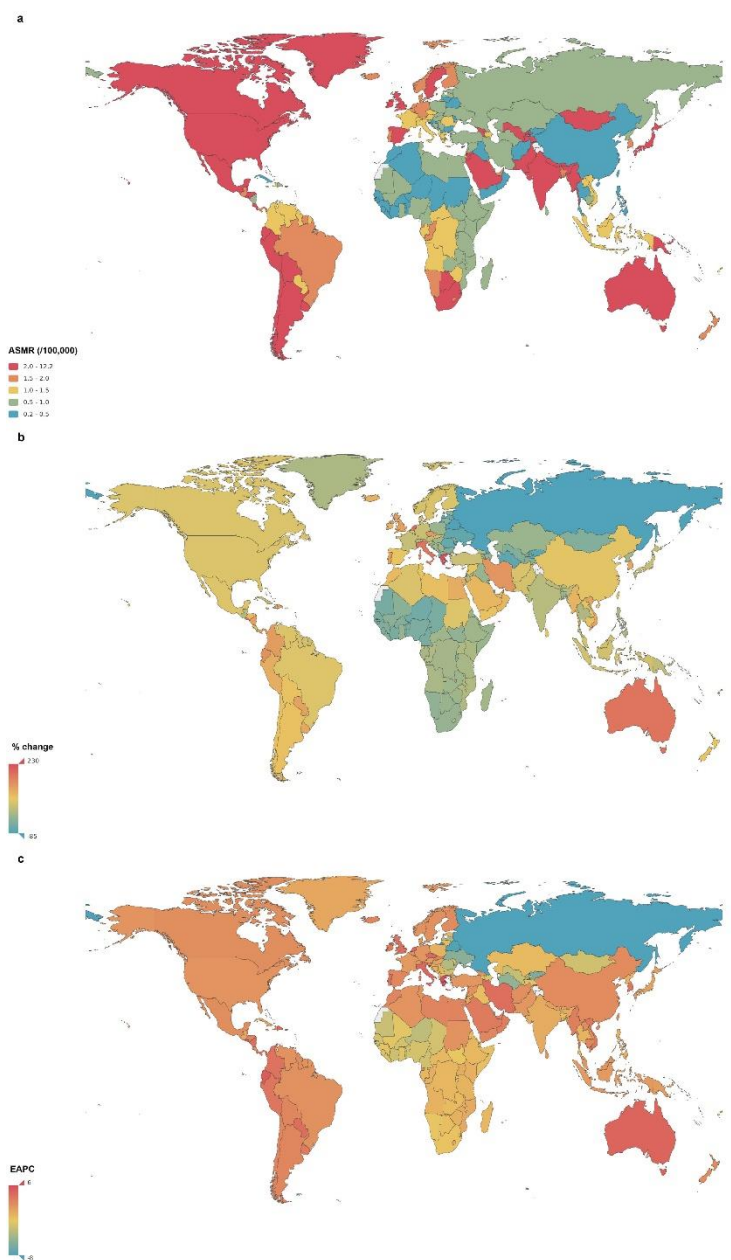

Supplemental Figure 5

The global mortality rates of chronic obstructive pulmonary disease (COPD) (a), pneumoconiosis (b), asthma (c), and interstitial lung disease and pulmonary sarcoidosis (d) by age and sex in 1990.

The shading indicates 95% uncertainty intervals.

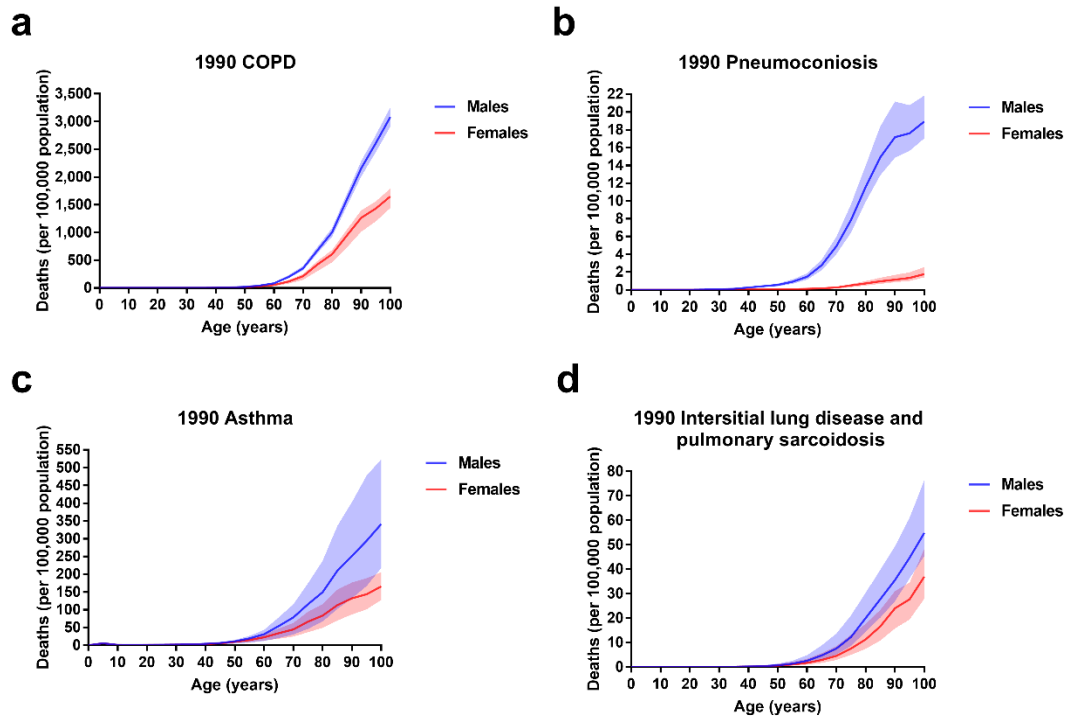

Supplemental Figure 6

The correlation between the sociodemographic index (SDI) and age-standardized mortality rates (ASMRs) of chronic obstructive pulmonary disease (COPD) (a), pneumoconiosis (b), asthma (c) and interstitial lung disease and pulmonary sarcoidosis (d) in 2017.

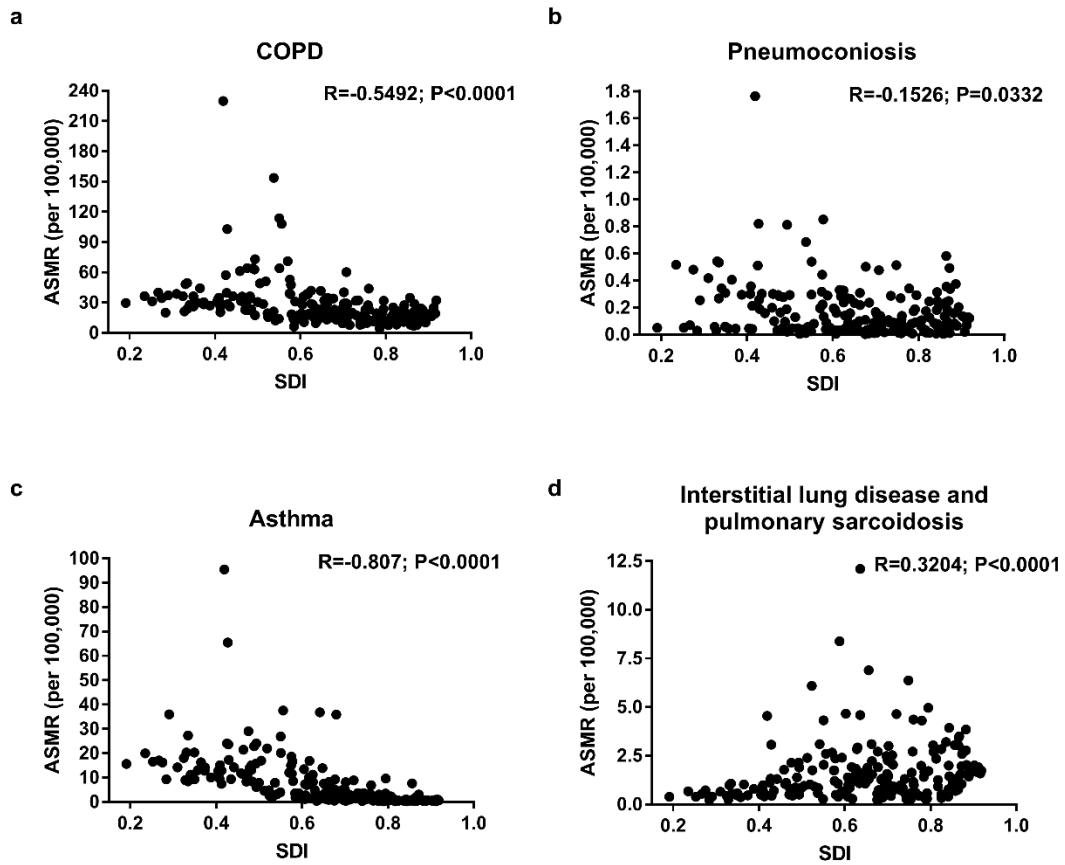

Supplemental Figure 7

The correlation between the change in the socio-demographic index (SDI) and estimated annual percentage change (EAPC) in the age-standardized mortality rates (ASMRs) of chronic obstructive pulmonary disease (COPD) (a), pneumoconiosis (b), asthma (c), and interstitial lung disease and pulmonary sarcoidosis (d) from 1990 to 2017.

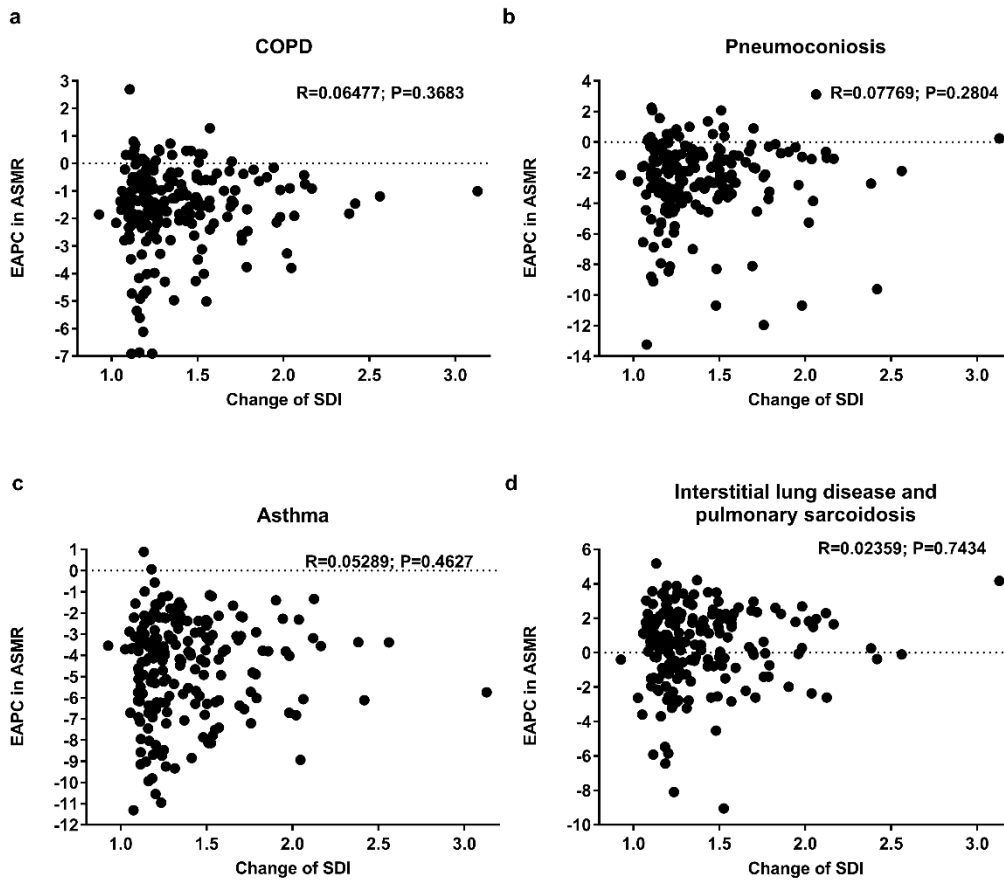

Supplemental Figure 8



The age-standardized disability-adjusted life years (DALYs) of chronic obstructive pulmonary disease (COPD) (a), pneumoconiosis (b), asthma (c), and interstitial lung disease and pulmonary sarcoidosis (d) grouped by sociodemographic index (SDI) quintiles from 1990 to 2017.

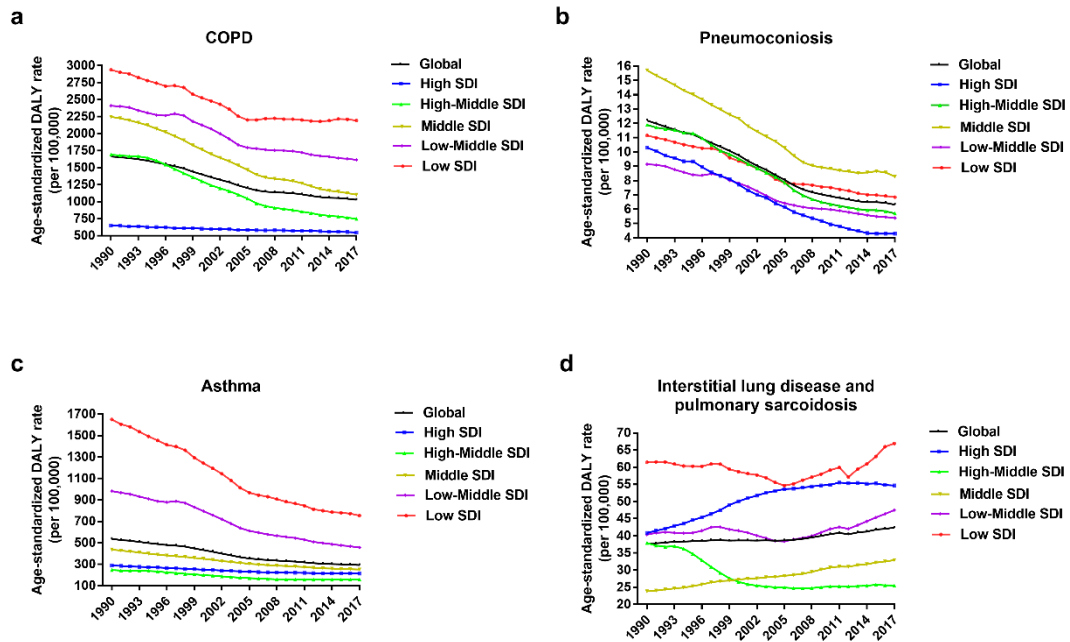

Supplemental Figure 9

The correlation between the sociodemographic index (SDI) and age-standardized disability-adjusted life years (DALYs) of chronic obstructive pulmonary disease (COPD) (a), pneumoconiosis (b), asthma (c), and interstitial lung disease and pulmonary sarcoidosis (d) in 2017.

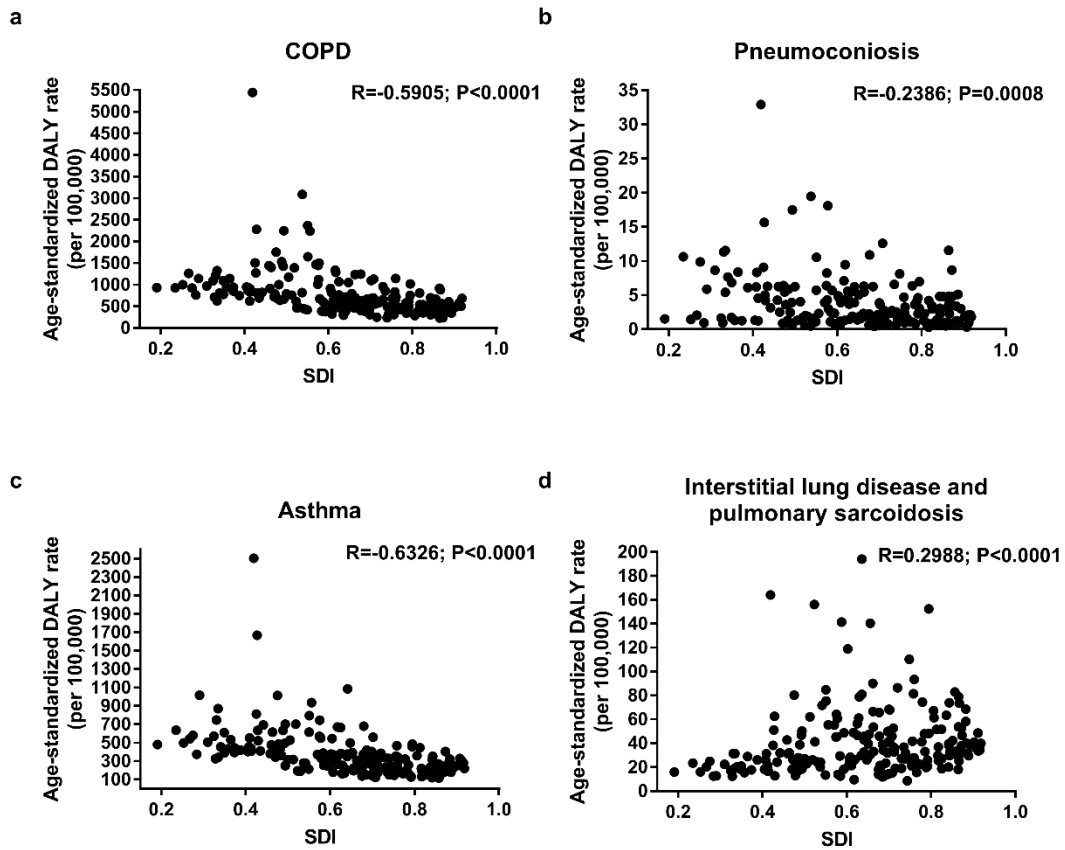

Supplemental Figure 10

a. The age-standardized mortality rates (ASMRs) of chronic obstructive pulmonary disease (COPD) attributed to the four types of risk factors in both sexes from 1990 to 2017.

b. The ASMRs of COPD attributed to tobacco, smoking and secondhand smoke in both sexes from 1990 to 2017.

c. The ASMRs of COPD attributed to smoking and secondhand smoke by sex from 1990 to 2017.

d. The ASMRs of COPD attributed to particulate matter pollution, ambient particulate matter pollution and household air pollution from solid fuels for both sexes from 1990 to 2017.

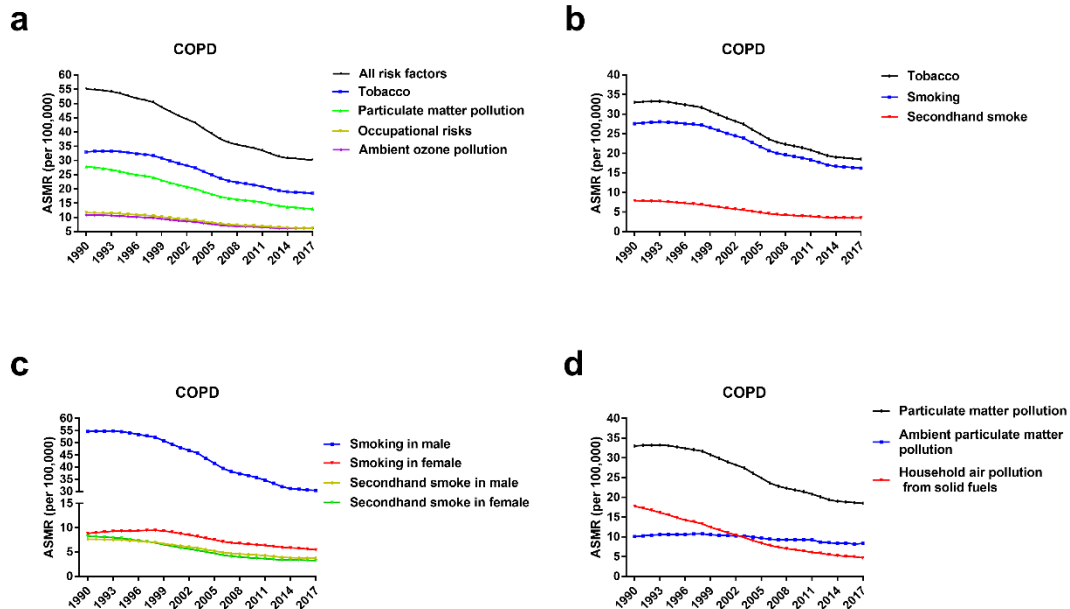

Supplemental Figure 11

a. The age-standardized disability-adjusted life years (DALYs) of chronic obstructive pulmonary disease (COPD) attributed to the four kinds of risk factors for both sexes from 1990 to 2017.

b. The age-standardized disability-adjusted life years (DALYs) of asthma attributed to the three kinds of risk factors for both sexes from 1990 to 2017.

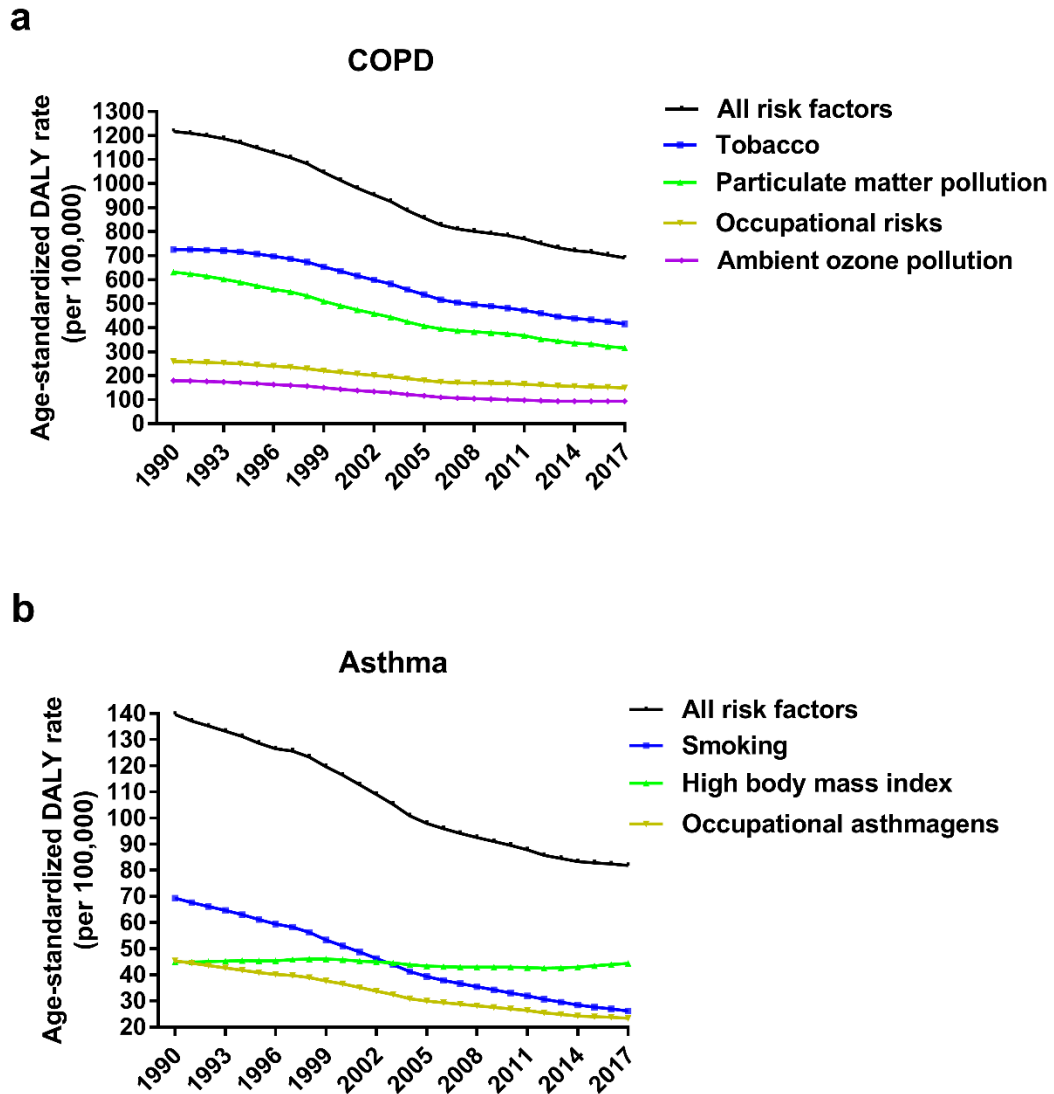

Supplemental Figure 12

The correlation between the sociodemographic index (SDI) and age-standardized mortality rates (ASMRs) of chronic obstructive pulmonary disease (COPD) attributed to tobacco (a), particulate matter pollution (b), occupational risks (c), and ambient ozone pollution (d) in 2017.

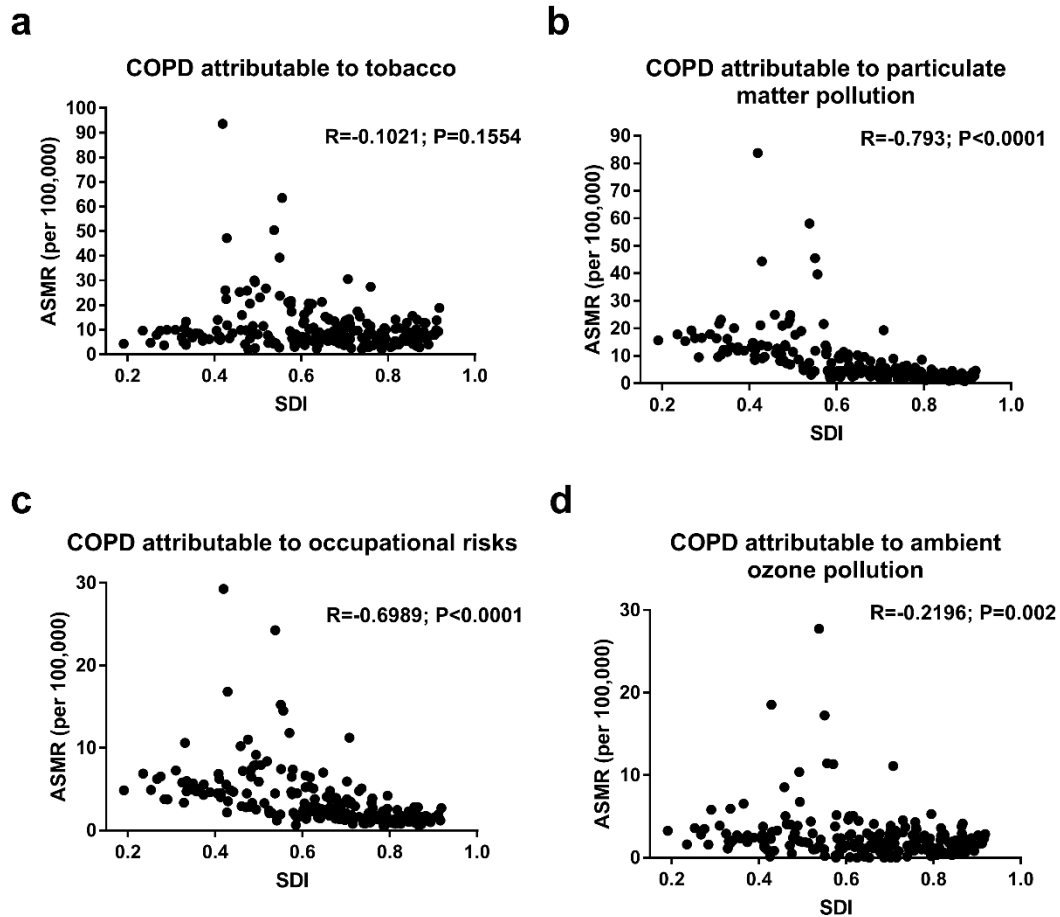

Supplemental Figure 13

a. The age-standardized mortality rates (ASMRs) of asthma attributed to the three types of risk factors for both sexes from 1990 to 2017.

b. The ASMR of asthma attributed to smoking by sex from 1990 to 2017.

c. The ASMR of asthma attributed to a high body mass index by sex from 1990 to 2017.

ASMR, age-standardized mortality rate.

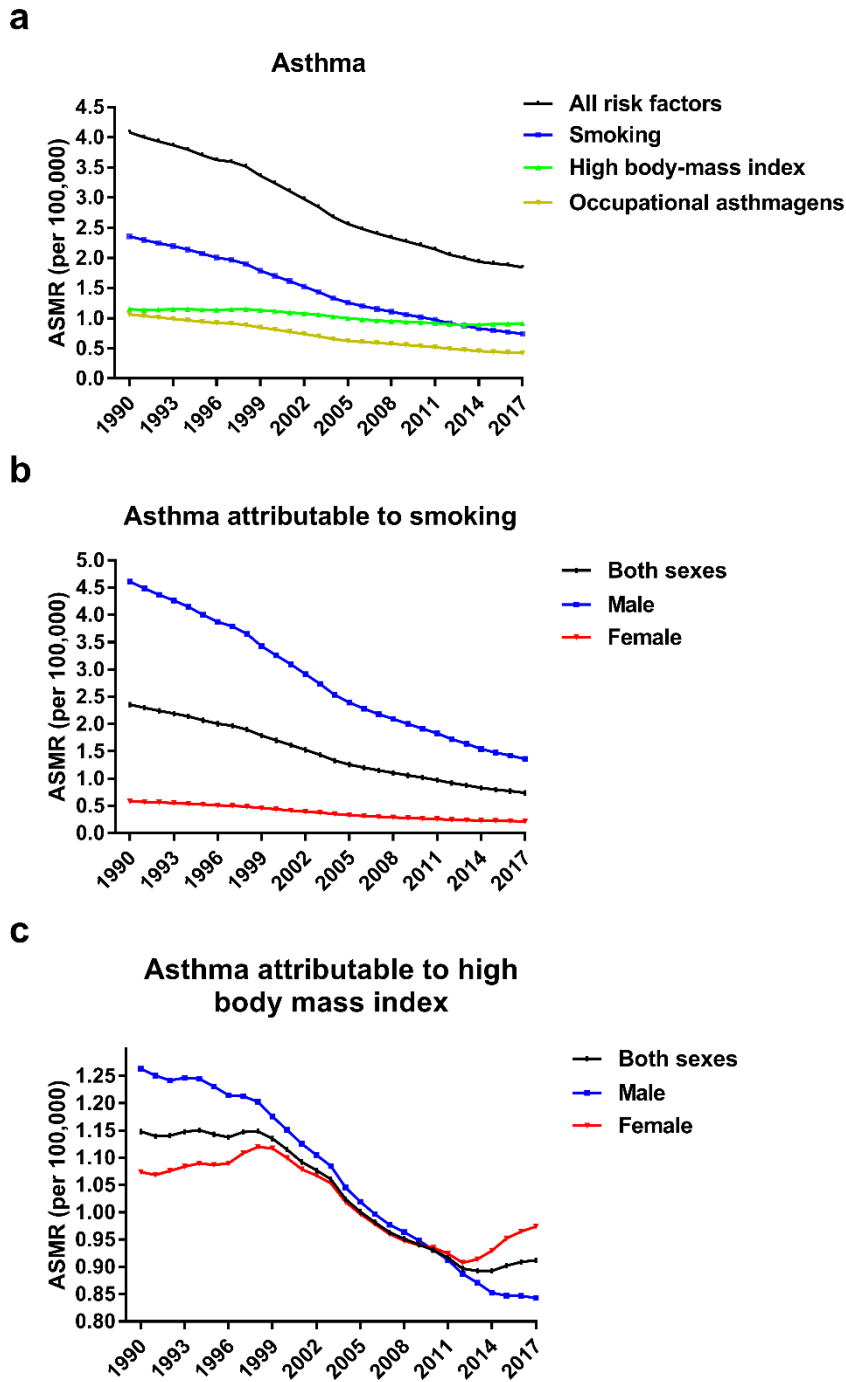

Supplemental Figure 14

The correlation between the sociodemographic index (SDI) and age-standardized mortality rates (ASMRs) of asthma attributable to smoking (a), a high body mass index (b), and occupational asthmagens (c) in 2017.

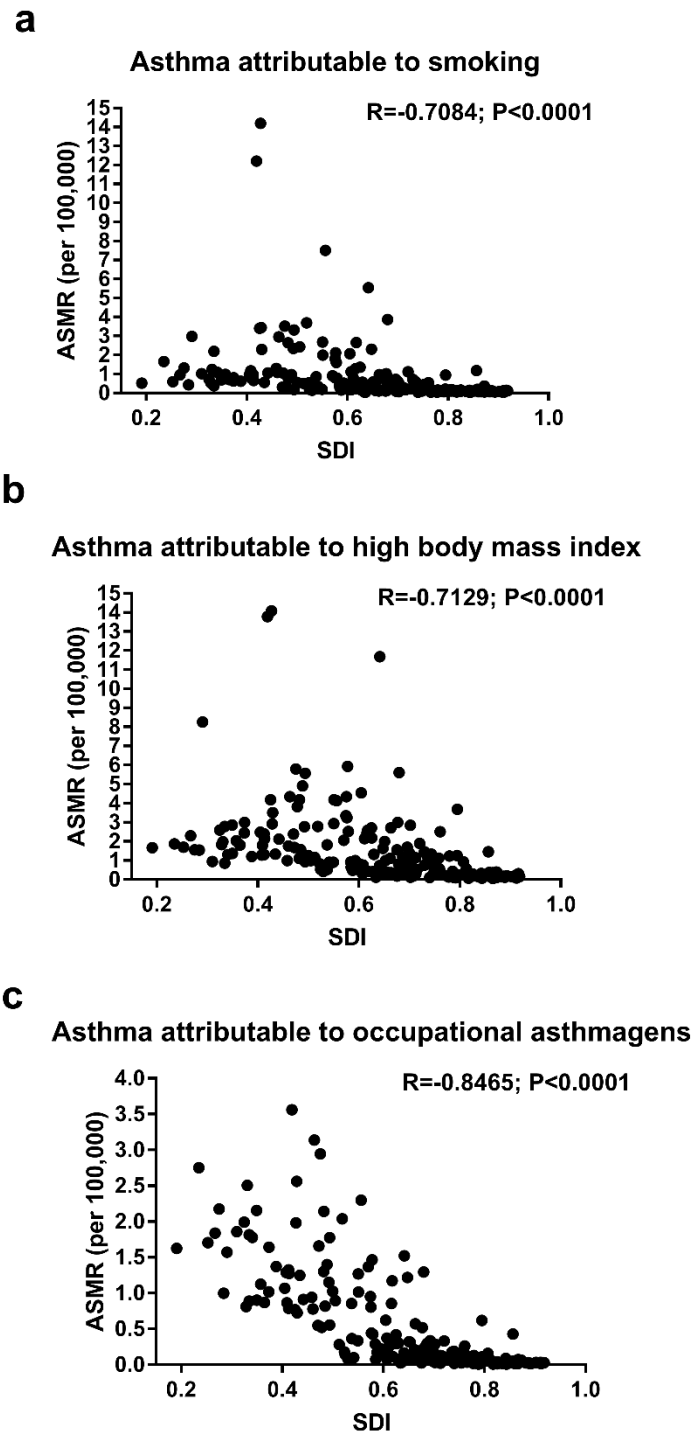

Supplemental Figure 15

The correlation between the sociodemographic index (SDI) and age-standardized incidence rates (ASIRs) of chronic obstructive pulmonary disease (COPD) (a), pneumoconiosis (b), asthma (c), and interstitial lung disease and pulmonary sarcoidosis (d) in 2017.

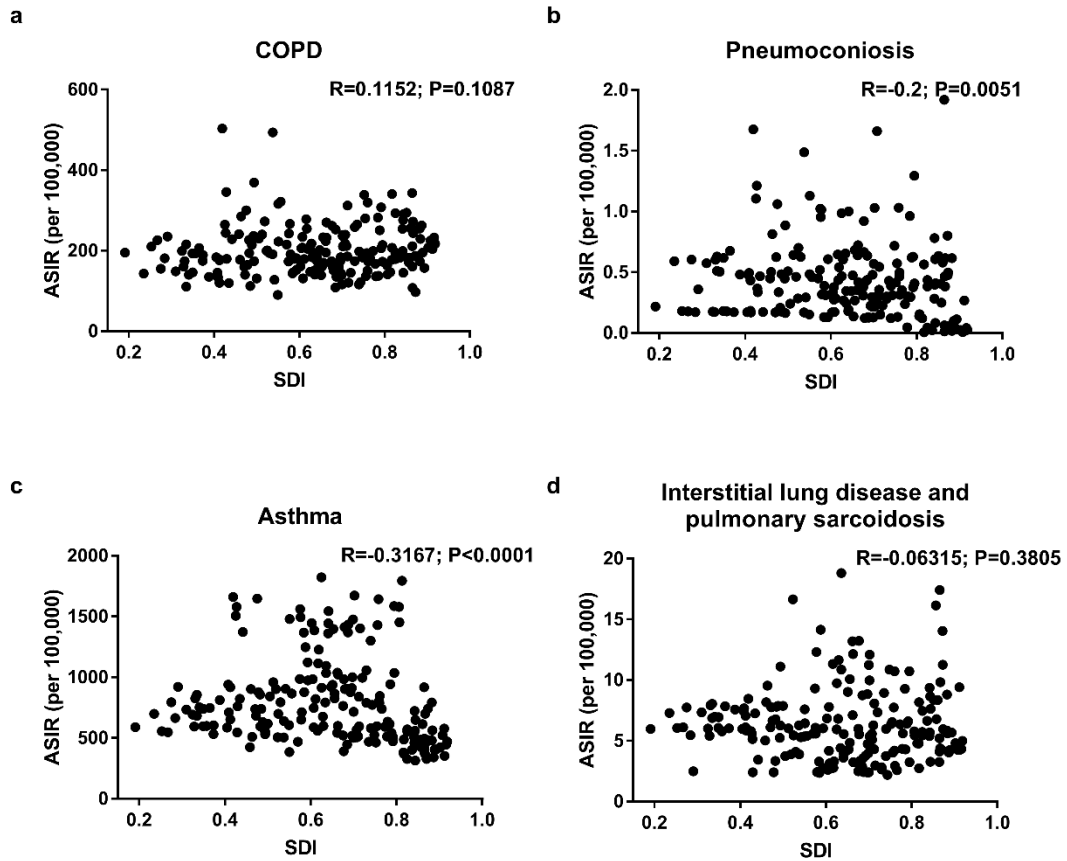

Supplemental Table 1. List of International Classification of Diseases (ICD) codes



| Cause                                               | ICD-10                                                                                                                      |
|-----------------------------------------------------|-----------------------------------------------------------------------------------------------------------------------------|
| Chronic respiratory diseases                        | D86-D86.2; D86.9; G47.3, J30-J35.9; J37-J39.9; J41-J46.9; J60-J63.8; J65-J68.9; J70; J70.8-J70.9; J82; J84-J84.9; J91-J92.9 |
| Chronic obstructive pulmonary disease               | J40-J44.9; J47-J47.9                                                                                                        |
| Pneumoconiosis                                      | J60-63.8; J65-J65.0; J92.0                                                                                                  |
| Silicosis                                           | J62-J62.9                                                                                                                   |
| Asbestosis                                          | J61-J61.0; J92.0                                                                                                            |
| Coal workers pneumoconiosis                         | J60-J60.0                                                                                                                   |
| Other pneumoconiosis                                | J63-63.8; J65-65.0                                                                                                          |
| Asthma                                              | J45-J46.9                                                                                                                   |
| Interstitial lung disease and pulmonary sarcoidosis | D86-86.2; D86.89-D86.9; J84-J84.9                                                                                           |

Supplemental Table 2. The global mortality, ASMR, and DALY due to chronic respiratory diseases in 1990 and 2017

|             | Chronic respiratory diseases    | Chronic obstructive pulmonary disease | Pneumoconiosis               |                        |                       |                             | Asthma           | Interstitial lung disease and pulmonary sarcoidosis |                           |                        |
|-------------|---------------------------------|---------------------------------------|------------------------------|------------------------|-----------------------|-----------------------------|------------------|-----------------------------------------------------|---------------------------|------------------------|
|             |                                 |                                       | Overall                      | Silicosis              | Asbestosis            | Coal workers pneumoconiosis |                  |                                                     | Other pneumoconiosis      |                        |
| <b>1990</b> | <b>DALY*10<sup>6</sup></b>      | 99.10<br>(91.72-104.76)*              | 68.19<br>(61.54-74.69)       | 0.52<br>(0.44-0.60)    | 0.29<br>(0.23-0.36)   | 0.04<br>(0.03-0.05)         | 0.11 (0.08-0.16) | 0.08 (0.06-0.11)                                    | 26.05<br>(19.95-31.28)    | 1.59 (1.21-2.13)       |
|             | <b>No. death*10<sup>3</sup></b> | 3317.21<br>(3011.59-3425.40)          | 2600.14<br>(2288.98-2860.08) | 20.38<br>(17.22-23.95) | 11.49<br>(9.10-14.30) | 1.45<br>(0.97-1.97)         | 4.77 (3.36-6.74) | 2.67 (1.85-3.65)                                    | 599.28<br>(336.25-771.28) | 56.43<br>(42.30-74.97) |
|             | <b>both sexes</b>               | 89.53<br>(81.20-92.47)                | 71.88<br>(63.56-78.63)       | 0.52<br>(0.44-0.61)    | 0.29<br>(0.23-0.36)   | 0.04<br>(0.03-0.05)         | 0.13 (0.09-0.18) | 0.07 (0.05-0.09)                                    | 14.68<br>(8.26-19.08)     | 1.50 (1.14-1.96)       |
|             | <b>ASMR (per 100,000)</b>       | 117.29<br>(112.76-121.35)             | 94.24<br>(85.85-103.04)      | 1.11<br>(0.92-1.34)    | 0.64<br>(0.51-0.80)   | 0.08<br>(0.05-0.11)         | 0.29 (0.20-0.40) | 0.11 (0.06-0.17)                                    | 18.64<br>(8.40-27.28)     | 1.91 (1.39-3.02)       |
|             | <b>male</b>                     | 70.32<br>(55.04-74.97)                | 56.64<br>(42.11-64.85)       | 0.08<br>(0.05-0.10)    | 0.02<br>(0.01-0.03)   | 0.01<br>(0.01-0.02)         | 0.01 (0.00-0.01) | 0.03 (0.02-0.05)                                    | 11.78<br>(7.28-15.44)     | 1.22 (0.80-2.00)       |
|             | <b>female</b>                   |                                       |                              |                        |                       |                             |                  |                                                     |                           |                        |

|             |                                   |                                  |                                  |                            |                            |                         |                  |                  |                               |                               |
|-------------|-----------------------------------|----------------------------------|----------------------------------|----------------------------|----------------------------|-------------------------|------------------|------------------|-------------------------------|-------------------------------|
| <b>2017</b> | <b>DALY*10<sup>6</sup></b>        | 112.32<br>(104.65-<br>119.69)    | 81.60<br>(75.98-<br>86.76)       | 0.51<br>(0.47-<br>0.55)    | 0.26<br>(0.23-<br>0.29)    | 0.07<br>(0.05-<br>0.08) | 0.08 (0.07-0.10) | 0.10 (0.08-0.12) | 22.76<br>(18.08-<br>28.34)    | 3.37 (2.77-<br>4.08)          |
|             | <b>No. death*10<sup>3</sup></b>   | 3914.20<br>(3790.58-<br>4044.82) | 3197.79<br>(3028.95-<br>3358.88) | 21.55<br>(20.47-<br>22.69) | 11.28<br>(10.39-<br>12.46) | 3.39<br>(2.31-<br>3.93) | 3.22 (2.90-4.04) | 3.65 (3.12-4.50) | 495.06<br>(338.20-<br>641.20) | 147.64<br>(114.92-<br>181.32) |
|             | <b>both<br/>sexes</b>             | 51.36<br>(49.75-<br>53.07)       | 42.16<br>(40.01-<br>44.20)       | 0.28<br>(0.26-<br>0.29)    | 0.14<br>(0.13-<br>0.16)    | 0.04<br>(0.03-<br>0.05) | 0.04 (0.04-0.05) | 0.05 (0.04-0.06) | 6.33<br>(4.34-<br>8.17)       | 1.93 (1.49-<br>2.36)          |
|             | <b>ASMR<br/>(per<br/>100,000)</b> | 65.43<br>(62.95-<br>67.28)       | 54.81<br>(51.46-<br>57.64)       | 0.56<br>(0.53-<br>0.59)    | 0.31<br>(0.28-<br>0.34)    | 0.09<br>(0.06-<br>0.11) | 0.09 (0.08-0.11) | 0.08 (0.06-0.10) | 6.74<br>(4.03-<br>9.44)       | 2.38 (1.82-<br>3.09)          |
|             | <b>male</b>                       | 40.79<br>(37.92-<br>43.81)       | 32.71<br>(29.72-<br>35.26)       | 0.06<br>(0.05-<br>0.06)    | 0.01<br>(0.01-<br>0.02)    | 0.01<br>(0.01-<br>0.01) | 0.01 (0.00-0.01) | 0.02 (0.02-0.03) | 6.01<br>(4.11-<br>7.83)       | 1.58 (1.06-<br>2.11)          |
|             | <b>female</b>                     |                                  |                                  |                            |                            |                         |                  |                  |                               |                               |

\*Data in parentheses shown as 95% confidence interval.

DALY, disability-adjusted life year; ASMR, age-standardized mortality rate.

Supplemental Table 3. The age-standardized mortality rates of chronic obstructive pulmonary disease, pneumoconiosis, asthma, interstitial lung disease and pulmonary sarcoidosis for both sexes combined in 2017

| Country             | Chronic obstructive pulmonary disease |              |              | Pneumoconiosis |              |              | Asthma         |              |              | Interstitial lung disease and pulmonary sarcoidosis |              |              |
|---------------------|---------------------------------------|--------------|--------------|----------------|--------------|--------------|----------------|--------------|--------------|-----------------------------------------------------|--------------|--------------|
|                     | Estimate value                        | Lower 95% UI | Upper 95% UI | Estimate value | Lower 95% UI | Upper 95% UI | Estimate value | Lower 95% UI | Upper 95% UI | Estimate value                                      | Lower 95% UI | Upper 95% UI |
| Afghanistan         | 37.34                                 | 27.58        | 51.35        | 0.25           | 0.15         | 0.39         | 35.95          | 19.66        | 48.49        | 0.41                                                | 0.15         | 0.95         |
| Albania             | 13.00                                 | 10.81        | 15.66        | 0.24           | 0.17         | 0.32         | 2.93           | 2.25         | 3.86         | 1.27                                                | 0.94         | 1.62         |
| Algeria             | 13.37                                 | 11.52        | 15.62        | 0.09           | 0.06         | 0.11         | 5.00           | 3.96         | 6.25         | 0.48                                                | 0.31         | 0.90         |
| American Samoa      | 40.29                                 | 35.44        | 45.43        | 0.15           | 0.12         | 0.20         | 8.15           | 7.06         | 9.70         | 1.03                                                | 0.86         | 1.27         |
| Andorra             | 18.72                                 | 14.61        | 22.93        | 0.14           | 0.10         | 0.19         | 0.55           | 0.41         | 0.75         | 2.01                                                | 1.06         | 2.78         |
| Angola              | 31.63                                 | 26.12        | 42.89        | 0.30           | 0.23         | 0.39         | 11.55          | 8.67         | 15.14        | 1.04                                                | 0.43         | 2.06         |
| Antigua and Barbuda | 7.87                                  | 7.23         | 8.55         | 0.09           | 0.08         | 0.11         | 1.81           | 1.63         | 2.01         | 0.76                                                | 0.53         | 0.89         |
| Argentina           | 28.60                                 | 25.88        | 31.57        | 0.14           | 0.11         | 0.17         | 0.98           | 0.86         | 1.11         | 2.52                                                | 2.09         | 3.28         |
| Armenia             | 29.18                                 | 27.38        | 31.24        | 0.03           | 0.03         | 0.04         | 0.42           | 0.37         | 0.46         | 3.00                                                | 1.69         | 3.74         |
| Australia           | 19.30                                 | 17.28        | 21.53        | 0.34           | 0.28         | 0.41         | 1.07           | 0.95         | 1.20         | 2.59                                                | 1.30         | 3.52         |
| Austria             | 15.19                                 | 14.27        | 16.15        | 0.10           | 0.08         | 0.11         | 0.38           | 0.34         | 0.42         | 1.00                                                | 0.83         | 1.25         |
| Azerbaijan          | 27.12                                 | 22.76        | 33.60        | 0.01           | 0.01         | 0.02         | 2.08           | 1.60         | 2.68         | 1.46                                                | 1.13         | 1.99         |
| Bahrain             | 16.80                                 | 14.64        | 21.58        | 0.10           | 0.08         | 0.14         | 2.82           | 2.34         | 3.85         | 2.03                                                | 1.44         | 2.54         |
| Bangladesh          | 61.22                                 | 54.40        | 69.20        | 0.20           | 0.14         | 0.30         | 11.78          | 7.61         | 16.57        | 1.77                                                | 1.02         | 3.05         |
| Barbados            | 8.05                                  | 7.27         | 8.83         | 0.03           | 0.02         | 0.03         | 2.52           | 2.22         | 2.82         | 1.31                                                | 1.05         | 1.53         |
| Belarus             | 11.26                                 | 10.50        | 12.18        | 0.04           | 0.03         | 0.05         | 0.62           | 0.47         | 0.73         | 0.44                                                | 0.36         | 0.54         |
| Belgium             | 22.48                                 | 20.93        | 24.11        | 0.37           | 0.32         | 0.44         | 0.59           | 0.53         | 0.65         | 1.56                                                | 1.05         | 1.88         |
| Belize              | 19.21                                 | 17.64        | 20.89        | 0.19           | 0.17         | 0.22         | 2.35           | 2.11         | 2.60         | 4.67                                                | 3.98         | 5.77         |
| Benin               | 30.54                                 | 25.78        | 36.48        | 0.04           | 0.03         | 0.06         | 14.17          | 10.59        | 19.08        | 0.46                                                | 0.30         | 0.69         |

|                             |       |       |       |      |      |      |       |       |       |      |      |       |
|-----------------------------|-------|-------|-------|------|------|------|-------|-------|-------|------|------|-------|
| Bermuda                     | 7.66  | 6.85  | 8.57  | 0.06 | 0.05 | 0.07 | 0.80  | 0.70  | 0.91  | 3.03 | 2.30 | 3.61  |
| Bhutan                      | 71.14 | 57.40 | 87.98 | 0.20 | 0.14 | 0.27 | 12.00 | 7.65  | 18.49 | 2.66 | 1.73 | 3.98  |
| Bolivia                     | 31.14 | 25.33 | 36.98 | 0.29 | 0.22 | 0.37 | 2.09  | 1.49  | 2.72  | 8.38 | 6.43 | 10.74 |
| Bosnia and<br>Herzegovina   | 20.51 | 18.75 | 22.49 | 0.05 | 0.04 | 0.06 | 1.12  | 0.93  | 1.29  | 0.92 | 0.65 | 1.11  |
| Botswana                    | 34.96 | 30.27 | 40.34 | 0.31 | 0.23 | 0.40 | 8.33  | 6.66  | 10.23 | 2.23 | 1.67 | 2.88  |
| Brazil                      | 30.41 | 29.69 | 31.28 | 0.22 | 0.19 | 0.23 | 1.16  | 1.10  | 1.23  | 1.54 | 0.95 | 1.76  |
| Brunei                      | 34.95 | 30.23 | 38.69 | 0.04 | 0.02 | 0.05 | 7.60  | 6.30  | 8.72  | 3.05 | 2.44 | 4.01  |
| Bulgaria                    | 20.04 | 18.61 | 21.54 | 0.19 | 0.15 | 0.22 | 0.30  | 0.26  | 0.34  | 0.30 | 0.23 | 0.44  |
| Burkina Faso                | 20.16 | 17.02 | 24.09 | 0.03 | 0.02 | 0.04 | 9.31  | 6.51  | 12.53 | 0.23 | 0.13 | 0.39  |
| Burundi                     | 38.76 | 32.23 | 46.17 | 0.42 | 0.26 | 0.83 | 14.23 | 8.80  | 18.65 | 0.65 | 0.22 | 1.29  |
| Cambodia                    | 36.32 | 30.81 | 42.26 | 0.03 | 0.03 | 0.05 | 13.14 | 8.37  | 17.42 | 0.64 | 0.45 | 0.93  |
| Cameroon                    | 34.02 | 28.11 | 40.89 | 0.05 | 0.03 | 0.06 | 15.15 | 10.78 | 21.04 | 0.73 | 0.49 | 1.00  |
| Canada                      | 17.92 | 16.58 | 19.51 | 0.16 | 0.13 | 0.19 | 0.42  | 0.37  | 0.46  | 2.77 | 1.70 | 3.48  |
| Cape Verde                  | 14.07 | 12.32 | 17.43 | 0.03 | 0.02 | 0.03 | 4.00  | 3.33  | 5.14  | 0.28 | 0.23 | 0.39  |
| Central African<br>Republic | 49.49 | 36.22 | 67.70 | 0.53 | 0.32 | 0.98 | 27.28 | 14.99 | 37.67 | 1.07 | 0.35 | 2.15  |
| Chad                        | 31.33 | 25.84 | 38.65 | 0.05 | 0.04 | 0.07 | 16.53 | 11.27 | 22.18 | 0.39 | 0.20 | 0.71  |
| Chile                       | 17.97 | 15.81 | 20.99 | 0.51 | 0.43 | 0.62 | 1.03  | 0.88  | 1.24  | 6.37 | 3.90 | 7.94  |
| China                       | 60.24 | 57.70 | 66.76 | 0.48 | 0.44 | 0.51 | 1.34  | 1.24  | 1.48  | 0.43 | 0.34 | 0.52  |
| Colombia                    | 25.10 | 22.92 | 27.53 | 0.13 | 0.11 | 0.15 | 0.43  | 0.37  | 0.50  | 1.09 | 0.72 | 1.30  |
| Comoros                     | 26.05 | 20.88 | 30.69 | 0.30 | 0.20 | 0.58 | 9.39  | 6.51  | 13.22 | 0.71 | 0.29 | 1.35  |
| Congo                       | 39.16 | 31.35 | 51.30 | 0.32 | 0.21 | 0.49 | 14.97 | 10.59 | 21.29 | 1.75 | 0.78 | 2.62  |
| Costa Rica                  | 22.79 | 20.98 | 24.55 | 0.03 | 0.02 | 0.03 | 0.91  | 0.79  | 1.02  | 3.10 | 2.44 | 3.70  |
| Cote d'Ivoire               | 26.05 | 21.35 | 31.27 | 0.04 | 0.03 | 0.06 | 12.86 | 8.09  | 17.05 | 0.41 | 0.27 | 0.58  |

|                                     |       |       |       |      |      |      |       |       |       |      |      |      |
|-------------------------------------|-------|-------|-------|------|------|------|-------|-------|-------|------|------|------|
| Croatia                             | 18.72 | 17.58 | 19.90 | 0.13 | 0.11 | 0.15 | 0.54  | 0.48  | 0.61  | 0.33 | 0.28 | 0.45 |
| Cuba                                | 20.33 | 18.38 | 22.34 | 0.01 | 0.01 | 0.02 | 1.46  | 1.27  | 1.65  | 0.35 | 0.28 | 0.51 |
| Cyprus                              | 19.77 | 16.94 | 22.45 | 0.07 | 0.06 | 0.09 | 1.15  | 0.88  | 1.36  | 3.02 | 1.40 | 3.96 |
| Czech Republic                      | 15.77 | 14.55 | 17.07 | 0.23 | 0.20 | 0.26 | 0.54  | 0.49  | 0.61  | 1.17 | 0.56 | 1.58 |
| Democratic Republic of<br>the Congo | 44.27 | 33.14 | 62.24 | 0.41 | 0.24 | 0.75 | 16.26 | 11.21 | 22.78 | 1.03 | 0.34 | 2.24 |
| Denmark                             | 32.36 | 30.29 | 34.61 | 0.12 | 0.10 | 0.14 | 0.61  | 0.55  | 0.68  | 1.73 | 1.47 | 2.19 |
| Djibouti                            | 23.36 | 16.14 | 30.57 | 0.28 | 0.19 | 0.49 | 8.34  | 4.94  | 13.30 | 0.87 | 0.36 | 1.63 |
| Dominica                            | 15.43 | 14.14 | 16.92 | 0.04 | 0.04 | 0.05 | 4.50  | 4.07  | 4.98  | 1.32 | 1.02 | 1.56 |
| Dominican Republic                  | 13.37 | 11.64 | 15.14 | 0.03 | 0.02 | 0.03 | 3.50  | 2.90  | 4.14  | 0.65 | 0.47 | 0.79 |
| Ecuador                             | 18.86 | 16.96 | 21.07 | 0.09 | 0.07 | 0.10 | 0.62  | 0.54  | 0.72  | 4.59 | 2.93 | 5.68 |
| Egypt                               | 28.08 | 23.34 | 32.74 | 0.19 | 0.13 | 0.24 | 13.48 | 10.32 | 17.73 | 0.76 | 0.39 | 1.65 |
| El Salvador                         | 17.15 | 14.76 | 20.48 | 0.05 | 0.04 | 0.06 | 2.67  | 2.17  | 3.25  | 2.40 | 1.53 | 3.03 |
| Equatorial Guinea                   | 28.83 | 19.07 | 43.58 | 0.24 | 0.15 | 0.34 | 8.19  | 4.97  | 15.19 | 1.84 | 0.78 | 3.37 |
| Eritrea                             | 34.96 | 25.26 | 44.16 | 0.36 | 0.23 | 0.61 | 15.16 | 9.74  | 20.33 | 0.98 | 0.37 | 1.90 |
| Estonia                             | 8.06  | 7.14  | 9.05  | 0.01 | 0.00 | 0.01 | 1.00  | 0.85  | 1.15  | 0.69 | 0.53 | 0.98 |
| Ethiopia                            | 23.67 | 18.83 | 27.00 | 0.27 | 0.17 | 0.45 | 8.45  | 5.51  | 12.93 | 0.50 | 0.17 | 1.11 |
| Federated States of<br>Micronesia   | 52.97 | 43.34 | 64.40 | 0.44 | 0.30 | 0.66 | 18.61 | 11.62 | 25.28 | 1.75 | 1.24 | 2.30 |
| Fiji                                | 20.67 | 17.99 | 23.73 | 0.03 | 0.03 | 0.04 | 36.83 | 32.35 | 42.24 | 1.20 | 0.96 | 1.49 |
| Finland                             | 10.27 | 9.30  | 11.38 | 0.20 | 0.17 | 0.24 | 0.66  | 0.58  | 0.75  | 1.92 | 1.15 | 2.45 |
| France                              | 9.16  | 8.50  | 9.88  | 0.35 | 0.31 | 0.41 | 0.63  | 0.57  | 0.70  | 1.40 | 1.10 | 1.65 |
| Gabon                               | 23.84 | 19.52 | 30.11 | 0.23 | 0.17 | 0.32 | 7.54  | 5.24  | 10.66 | 1.42 | 0.70 | 2.09 |
| Georgia                             | 24.42 | 22.55 | 26.08 | 0.06 | 0.04 | 0.07 | 1.63  | 1.48  | 1.81  | 2.26 | 1.76 | 2.62 |
| Germany                             | 18.73 | 16.98 | 20.59 | 0.25 | 0.21 | 0.29 | 0.62  | 0.55  | 0.70  | 1.56 | 1.14 | 1.87 |

|               |        |       |        |      |      |      |       |       |       |      |      |      |
|---------------|--------|-------|--------|------|------|------|-------|-------|-------|------|------|------|
| Ghana         | 21.21  | 18.38 | 24.07  | 0.01 | 0.01 | 0.02 | 7.85  | 6.43  | 9.62  | 0.57 | 0.45 | 0.74 |
| Greece        | 18.20  | 16.84 | 19.65  | 0.02 | 0.01 | 0.02 | 0.26  | 0.23  | 0.29  | 1.26 | 0.61 | 1.69 |
| Greenland     | 43.95  | 39.13 | 49.12  | 0.11 | 0.09 | 0.14 | 1.53  | 1.33  | 1.78  | 4.36 | 2.37 | 5.64 |
| Grenada       | 12.87  | 11.91 | 13.86  | 0.16 | 0.14 | 0.18 | 1.98  | 1.78  | 2.18  | 1.17 | 0.99 | 1.48 |
| Guam          | 23.63  | 21.41 | 26.23  | 0.09 | 0.08 | 0.11 | 3.42  | 2.82  | 4.22  | 4.96 | 4.13 | 6.44 |
| Guatemala     | 15.73  | 14.30 | 17.25  | 0.03 | 0.03 | 0.04 | 2.51  | 2.22  | 2.84  | 1.75 | 1.24 | 2.08 |
| Guinea        | 36.46  | 30.58 | 42.39  | 0.06 | 0.04 | 0.08 | 18.07 | 11.85 | 22.65 | 0.44 | 0.26 | 0.68 |
| Guinea-Bissau | 36.39  | 30.52 | 43.22  | 0.06 | 0.04 | 0.08 | 20.31 | 12.39 | 27.19 | 0.47 | 0.31 | 0.69 |
| Guyana        | 13.66  | 12.21 | 15.31  | 0.04 | 0.03 | 0.05 | 3.50  | 3.05  | 3.99  | 1.07 | 0.82 | 1.29 |
| Haiti         | 36.59  | 27.02 | 45.18  | 0.16 | 0.11 | 0.25 | 14.19 | 6.76  | 20.97 | 1.31 | 0.77 | 2.10 |
| Honduras      | 28.74  | 22.83 | 36.14  | 0.13 | 0.09 | 0.20 | 4.53  | 3.13  | 6.52  | 2.40 | 1.56 | 3.47 |
| Hungary       | 25.29  | 23.90 | 26.77  | 0.17 | 0.15 | 0.20 | 0.55  | 0.50  | 0.61  | 0.92 | 0.73 | 1.10 |
| Iceland       | 16.67  | 15.62 | 17.79  | 0.02 | 0.02 | 0.02 | 0.43  | 0.39  | 0.48  | 1.67 | 1.24 | 1.99 |
| India         | 113.73 | 94.03 | 127.54 | 0.30 | 0.24 | 0.36 | 26.85 | 14.49 | 38.76 | 4.32 | 2.64 | 6.90 |
| Indonesia     | 41.74  | 35.72 | 46.60  | 0.04 | 0.03 | 0.05 | 13.84 | 9.52  | 18.52 | 1.07 | 0.84 | 1.50 |
| Iran          | 18.85  | 18.05 | 20.19  | 0.17 | 0.15 | 0.19 | 5.03  | 4.75  | 5.49  | 0.55 | 0.37 | 0.62 |
| Iraq          | 6.38   | 5.78  | 7.32   | 0.09 | 0.07 | 0.11 | 1.89  | 1.69  | 2.18  | 0.39 | 0.33 | 0.53 |
| Ireland       | 24.26  | 22.02 | 27.02  | 0.07 | 0.06 | 0.09 | 0.57  | 0.49  | 0.65  | 3.85 | 2.13 | 4.97 |
| Israel        | 12.14  | 11.28 | 13.02  | 0.03 | 0.03 | 0.04 | 0.97  | 0.87  | 1.07  | 1.28 | 1.05 | 1.52 |
| Italy         | 13.14  | 12.25 | 14.19  | 0.25 | 0.21 | 0.28 | 0.26  | 0.23  | 0.29  | 1.44 | 0.93 | 1.75 |
| Jamaica       | 18.86  | 16.20 | 21.78  | 0.03 | 0.03 | 0.04 | 2.94  | 2.52  | 3.45  | 0.74 | 0.53 | 0.91 |
| Japan         | 7.11   | 6.61  | 7.99   | 0.24 | 0.22 | 0.27 | 0.45  | 0.42  | 0.51  | 3.43 | 2.54 | 3.86 |
| Jordan        | 12.20  | 10.68 | 13.94  | 0.02 | 0.02 | 0.03 | 1.80  | 1.50  | 2.25  | 2.48 | 1.86 | 3.05 |
| Kazakhstan    | 32.20  | 30.03 | 34.94  | 0.29 | 0.24 | 0.34 | 3.39  | 3.00  | 3.84  | 0.81 | 0.67 | 1.10 |
| Kenya         | 30.76  | 26.35 | 39.44  | 0.29 | 0.20 | 0.46 | 7.88  | 6.30  | 11.28 | 0.86 | 0.37 | 1.71 |

|                  |       |       |       |      |      |      |       |       |       |      |      |      |
|------------------|-------|-------|-------|------|------|------|-------|-------|-------|------|------|------|
| Kiribati         | 39.73 | 34.09 | 46.09 | 0.82 | 0.64 | 1.06 | 65.49 | 54.62 | 77.67 | 1.32 | 0.96 | 1.67 |
| Kuwait           | 4.50  | 4.07  | 4.97  | 0.01 | 0.01 | 0.01 | 1.06  | 0.93  | 1.19  | 1.66 | 1.35 | 1.98 |
| Kyrgyzstan       | 35.70 | 33.93 | 37.56 | 0.01 | 0.00 | 0.01 | 1.22  | 1.10  | 1.36  | 0.40 | 0.30 | 0.61 |
| Laos             | 51.13 | 41.62 | 62.23 | 0.05 | 0.03 | 0.07 | 21.96 | 13.90 | 31.97 | 1.03 | 0.72 | 1.49 |
| Latvia           | 8.29  | 7.51  | 9.12  | 0.01 | 0.01 | 0.01 | 0.83  | 0.72  | 0.94  | 0.52 | 0.40 | 0.77 |
| Lebanon          | 17.75 | 13.72 | 21.52 | 0.11 | 0.06 | 0.14 | 3.63  | 1.88  | 6.21  | 0.73 | 0.42 | 1.47 |
| Lesotho          | 73.06 | 58.09 | 90.05 | 0.81 | 0.57 | 1.17 | 24.00 | 17.41 | 31.05 | 1.90 | 1.28 | 2.66 |
| Liberia          | 21.30 | 17.39 | 26.24 | 0.03 | 0.02 | 0.05 | 8.99  | 6.72  | 12.26 | 0.26 | 0.15 | 0.39 |
| Libya            | 23.14 | 17.39 | 28.86 | 0.14 | 0.09 | 0.19 | 6.89  | 4.86  | 9.59  | 1.00 | 0.48 | 2.02 |
| Lithuania        | 11.09 | 10.36 | 11.83 | 0.01 | 0.01 | 0.01 | 0.61  | 0.55  | 0.67  | 0.40 | 0.33 | 0.57 |
| Luxembourg       | 19.37 | 17.32 | 21.57 | 0.13 | 0.11 | 0.15 | 0.97  | 0.83  | 1.12  | 1.59 | 1.10 | 2.00 |
| Macedonia        | 14.44 | 13.20 | 16.17 | 0.01 | 0.01 | 0.02 | 1.32  | 1.11  | 1.58  | 0.28 | 0.22 | 0.37 |
| Madagascar       | 48.39 | 40.51 | 56.74 | 0.54 | 0.33 | 0.95 | 20.33 | 14.14 | 27.14 | 0.99 | 0.37 | 1.86 |
| Malawi           | 26.21 | 22.79 | 30.27 | 0.31 | 0.19 | 0.60 | 9.30  | 6.56  | 12.44 | 0.57 | 0.21 | 1.10 |
| Malaysia         | 23.77 | 20.62 | 31.63 | 0.01 | 0.01 | 0.01 | 2.14  | 1.66  | 2.95  | 1.16 | 0.89 | 1.80 |
| Maldives         | 32.33 | 29.10 | 36.52 | 0.06 | 0.05 | 0.07 | 1.79  | 1.46  | 2.31  | 6.89 | 5.71 | 8.76 |
| Mali             | 40.20 | 31.82 | 49.69 | 0.07 | 0.05 | 0.10 | 17.03 | 12.94 | 23.15 | 0.55 | 0.22 | 1.00 |
| Malta            | 14.25 | 13.25 | 15.51 | 0.09 | 0.07 | 0.10 | 0.55  | 0.48  | 0.64  | 3.20 | 2.16 | 3.86 |
| Marshall Islands | 64.03 | 52.72 | 77.38 | 0.54 | 0.39 | 0.78 | 20.14 | 11.36 | 27.18 | 2.03 | 1.49 | 2.86 |
| Mauritania       | 22.89 | 18.24 | 27.67 | 0.03 | 0.02 | 0.04 | 8.40  | 6.52  | 10.82 | 0.50 | 0.34 | 0.71 |
| Mauritius        | 20.25 | 18.37 | 22.59 | 0.02 | 0.02 | 0.02 | 8.85  | 7.91  | 10.06 | 4.64 | 2.36 | 6.02 |
| Mexico           | 28.25 | 27.49 | 29.18 | 0.14 | 0.13 | 0.15 | 1.40  | 1.31  | 1.50  | 2.84 | 1.84 | 3.24 |
| Moldova          | 15.23 | 14.54 | 15.99 | 0.00 | 0.00 | 0.00 | 0.55  | 0.50  | 0.61  | 0.24 | 0.18 | 0.36 |
| Mongolia         | 13.25 | 11.68 | 16.82 | 0.10 | 0.08 | 0.12 | 4.64  | 3.93  | 5.74  | 3.12 | 2.58 | 3.72 |
| Montenegro       | 7.91  | 7.04  | 8.83  | 0.17 | 0.14 | 0.22 | 0.31  | 0.26  | 0.40  | 0.27 | 0.22 | 0.34 |



|                             |        |        |        |      |      |      |       |       |        |       |      |       |
|-----------------------------|--------|--------|--------|------|------|------|-------|-------|--------|-------|------|-------|
| Morocco                     | 18.59  | 15.12  | 22.90  | 0.13 | 0.10 | 0.17 | 8.53  | 6.26  | 10.62  | 0.49  | 0.32 | 0.94  |
| Mozambique                  | 27.89  | 23.75  | 33.05  | 0.34 | 0.22 | 0.63 | 11.17 | 7.51  | 14.76  | 0.54  | 0.24 | 1.04  |
| Myanmar                     | 108.01 | 73.98  | 126.75 | 0.08 | 0.06 | 0.11 | 37.53 | 24.26 | 50.14  | 2.60  | 1.81 | 3.55  |
| Namibia                     | 38.73  | 33.22  | 47.69  | 0.33 | 0.26 | 0.41 | 9.99  | 8.12  | 13.13  | 1.92  | 1.32 | 2.51  |
| Nepal                       | 102.90 | 84.21  | 129.57 | 0.26 | 0.18 | 0.41 | 23.66 | 14.84 | 36.72  | 3.06  | 1.36 | 5.88  |
| Netherlands                 | 25.11  | 23.32  | 27.12  | 0.07 | 0.06 | 0.08 | 0.33  | 0.30  | 0.37   | 1.65  | 0.84 | 2.20  |
| New Zealand                 | 22.35  | 20.80  | 24.25  | 0.18 | 0.15 | 0.22 | 1.07  | 0.99  | 1.16   | 2.00  | 1.05 | 2.63  |
| Nicaragua                   | 17.62  | 15.12  | 19.65  | 0.04 | 0.03 | 0.05 | 1.56  | 1.31  | 1.82   | 0.91  | 0.61 | 1.10  |
| Niger                       | 29.79  | 23.49  | 38.86  | 0.05 | 0.03 | 0.08 | 15.61 | 10.30 | 23.46  | 0.39  | 0.14 | 0.79  |
| Nigeria                     | 17.50  | 13.06  | 23.81  | 0.02 | 0.02 | 0.03 | 6.13  | 4.29  | 9.36   | 0.51  | 0.32 | 0.79  |
| North Korea                 | 153.65 | 123.63 | 210.14 | 0.68 | 0.47 | 1.04 | 7.76  | 5.30  | 11.96  | 0.85  | 0.48 | 1.41  |
| Northern Mariana<br>Islands | 27.57  | 24.63  | 31.28  | 0.27 | 0.21 | 0.34 | 3.54  | 2.95  | 4.37   | 2.71  | 2.30 | 3.24  |
| Norway                      | 21.91  | 21.25  | 22.73  | 0.11 | 0.11 | 0.12 | 0.86  | 0.81  | 0.91   | 1.91  | 1.59 | 2.30  |
| Oman                        | 8.57   | 7.10   | 10.07  | 0.04 | 0.03 | 0.05 | 3.66  | 2.83  | 4.59   | 0.27  | 0.20 | 0.39  |
| Pakistan                    | 62.93  | 52.58  | 75.18  | 0.19 | 0.13 | 0.28 | 15.72 | 9.05  | 27.02  | 2.16  | 1.36 | 3.40  |
| Palestine                   | 12.33  | 10.98  | 14.64  | 0.06 | 0.04 | 0.09 | 3.15  | 2.76  | 3.86   | 3.10  | 2.64 | 3.77  |
| Panama                      | 15.05  | 14.02  | 16.10  | 0.03 | 0.02 | 0.03 | 1.37  | 1.22  | 1.54   | 1.91  | 1.30 | 2.25  |
| Papua New Guinea            | 229.89 | 192.79 | 274.02 | 1.76 | 1.23 | 2.50 | 95.43 | 49.09 | 138.82 | 4.54  | 2.75 | 7.27  |
| Paraguay                    | 18.82  | 15.90  | 22.82  | 0.28 | 0.21 | 0.37 | 1.56  | 1.25  | 2.05   | 1.20  | 0.86 | 1.54  |
| Peru                        | 9.73   | 8.21   | 11.76  | 0.27 | 0.21 | 0.34 | 0.58  | 0.47  | 0.70   | 12.10 | 7.74 | 14.53 |
| Philippines                 | 38.40  | 34.12  | 43.33  | 0.03 | 0.03 | 0.04 | 16.89 | 15.01 | 19.16  | 0.29  | 0.21 | 0.43  |
| Poland                      | 14.57  | 13.58  | 15.61  | 0.08 | 0.07 | 0.09 | 0.66  | 0.59  | 0.72   | 0.67  | 0.51 | 0.78  |
| Portugal                    | 19.40  | 18.09  | 20.83  | 0.34 | 0.30 | 0.40 | 0.47  | 0.41  | 0.53   | 1.98  | 1.35 | 2.33  |
| Puerto Rico                 | 16.10  | 14.85  | 17.63  | 0.02 | 0.02 | 0.03 | 1.30  | 1.17  | 1.46   | 2.35  | 1.44 | 2.89  |

|                                     |       |       |       |      |      |      |       |       |       |      |      |      |
|-------------------------------------|-------|-------|-------|------|------|------|-------|-------|-------|------|------|------|
| Qatar                               | 11.95 | 10.08 | 14.35 | 0.06 | 0.04 | 0.08 | 0.55  | 0.43  | 0.76  | 0.58 | 0.44 | 0.84 |
| Romania                             | 17.04 | 15.76 | 18.29 | 0.08 | 0.07 | 0.09 | 0.57  | 0.51  | 0.64  | 1.41 | 0.98 | 2.31 |
| Russian Federation                  | 14.57 | 14.07 | 15.14 | 0.09 | 0.07 | 0.10 | 0.79  | 0.73  | 0.85  | 0.57 | 0.34 | 1.12 |
| Rwanda                              | 33.84 | 28.17 | 40.21 | 0.30 | 0.20 | 0.54 | 9.66  | 7.03  | 14.00 | 0.79 | 0.32 | 1.61 |
| Saint Lucia                         | 18.74 | 17.35 | 20.17 | 0.08 | 0.07 | 0.10 | 3.55  | 3.20  | 3.95  | 1.89 | 1.49 | 2.25 |
| Saint Vincent and the<br>Grenadines | 10.67 | 9.81  | 11.56 | 0.16 | 0.14 | 0.18 | 2.74  | 2.49  | 3.03  | 1.01 | 0.73 | 1.18 |
| Samoa                               | 38.56 | 32.44 | 45.54 | 0.22 | 0.16 | 0.31 | 11.64 | 8.63  | 15.39 | 1.21 | 0.89 | 1.59 |
| Sao Tome and Principe               | 63.95 | 51.94 | 75.86 | 0.10 | 0.07 | 0.12 | 22.86 | 16.31 | 28.23 | 1.39 | 0.98 | 1.78 |
| Saudi Arabia                        | 16.68 | 13.93 | 19.60 | 0.02 | 0.02 | 0.03 | 3.02  | 2.09  | 4.46  | 4.31 | 2.81 | 5.60 |
| Senegal                             | 28.27 | 23.80 | 33.51 | 0.04 | 0.03 | 0.06 | 12.77 | 9.64  | 16.39 | 0.47 | 0.29 | 0.68 |
| Serbia                              | 23.02 | 21.32 | 25.28 | 0.05 | 0.05 | 0.06 | 2.02  | 1.77  | 2.35  | 0.56 | 0.47 | 0.69 |
| Seychelles                          | 22.26 | 20.41 | 24.42 | 0.02 | 0.01 | 0.02 | 4.54  | 3.66  | 5.30  | 0.92 | 0.66 | 1.39 |
| Sierra Leone                        | 30.18 | 25.23 | 35.71 | 0.04 | 0.03 | 0.06 | 13.07 | 9.55  | 16.58 | 0.37 | 0.24 | 0.55 |
| Singapore                           | 7.68  | 7.00  | 8.41  | 0.01 | 0.01 | 0.01 | 0.57  | 0.51  | 0.63  | 1.05 | 0.72 | 1.67 |
| Slovakia                            | 10.89 | 9.88  | 12.55 | 0.07 | 0.06 | 0.09 | 0.52  | 0.45  | 0.62  | 0.78 | 0.63 | 0.91 |
| Slovenia                            | 11.48 | 10.50 | 12.61 | 0.14 | 0.12 | 0.16 | 0.40  | 0.35  | 0.46  | 0.91 | 0.45 | 1.23 |
| Solomon Islands                     | 57.31 | 46.70 | 68.53 | 0.51 | 0.33 | 0.81 | 24.02 | 11.43 | 34.23 | 1.12 | 0.70 | 1.73 |
| Somalia                             | 36.42 | 26.06 | 48.34 | 0.52 | 0.27 | 1.05 | 19.97 | 11.43 | 30.02 | 0.68 | 0.18 | 1.57 |
| South Africa                        | 34.01 | 32.32 | 36.23 | 0.50 | 0.46 | 0.57 | 9.30  | 8.50  | 10.13 | 2.71 | 2.27 | 3.66 |
| South Korea                         | 12.58 | 11.57 | 13.71 | 0.49 | 0.42 | 0.58 | 3.01  | 2.65  | 3.35  | 1.96 | 1.49 | 2.29 |
| South Sudan                         | 34.50 | 25.48 | 46.19 | 0.48 | 0.28 | 0.74 | 16.19 | 9.21  | 23.22 | 0.73 | 0.22 | 1.59 |
| Spain                               | 22.03 | 20.51 | 23.66 | 0.24 | 0.21 | 0.28 | 0.78  | 0.69  | 0.88  | 2.84 | 1.85 | 3.41 |
| Sri Lanka                           | 23.07 | 19.09 | 27.61 | 0.01 | 0.01 | 0.02 | 35.85 | 27.14 | 42.93 | 0.75 | 0.55 | 1.01 |
| Sudan                               | 22.63 | 17.88 | 28.67 | 0.16 | 0.11 | 0.23 | 13.98 | 7.65  | 20.12 | 0.45 | 0.26 | 0.91 |

|                      |       |       |       |      |      |      |       |       |       |      |      |      |
|----------------------|-------|-------|-------|------|------|------|-------|-------|-------|------|------|------|
| Suriname             | 16.21 | 14.76 | 17.79 | 0.26 | 0.22 | 0.31 | 2.38  | 2.07  | 2.72  | 1.62 | 1.27 | 1.94 |
| Swaziland            | 47.78 | 40.03 | 56.00 | 0.85 | 0.60 | 1.17 | 16.60 | 12.96 | 20.68 | 2.36 | 1.63 | 3.08 |
| Sweden               | 15.33 | 14.19 | 16.51 | 0.08 | 0.07 | 0.10 | 0.61  | 0.56  | 0.68  | 2.03 | 1.33 | 2.46 |
| Switzerland          | 11.79 | 10.91 | 12.67 | 0.07 | 0.05 | 0.08 | 0.49  | 0.44  | 0.55  | 1.44 | 1.07 | 1.67 |
| Syria                | 16.51 | 13.90 | 19.59 | 0.03 | 0.02 | 0.04 | 6.95  | 5.86  | 8.58  | 0.84 | 0.63 | 1.29 |
| Taiwan               | 20.55 | 19.25 | 21.92 | 0.58 | 0.51 | 0.65 | 1.77  | 1.61  | 1.94  | 0.76 | 0.39 | 1.01 |
| Tajikistan           | 19.50 | 16.93 | 22.95 | 0.00 | 0.00 | 0.01 | 4.83  | 4.01  | 6.04  | 6.09 | 4.93 | 8.36 |
| Tanzania             | 20.42 | 17.35 | 23.88 | 0.21 | 0.14 | 0.34 | 7.43  | 5.15  | 10.33 | 0.56 | 0.25 | 1.01 |
| Thailand             | 17.31 | 15.29 | 21.17 | 0.01 | 0.01 | 0.01 | 3.71  | 3.18  | 4.54  | 0.33 | 0.25 | 0.54 |
| The Bahamas          | 9.84  | 8.93  | 10.82 | 0.07 | 0.06 | 0.09 | 1.88  | 1.64  | 2.12  | 1.63 | 1.26 | 1.91 |
| The Gambia           | 31.21 | 26.03 | 37.41 | 0.05 | 0.03 | 0.07 | 12.72 | 9.50  | 17.17 | 0.50 | 0.33 | 0.71 |
| Timor-Leste          | 49.03 | 40.29 | 57.75 | 0.05 | 0.03 | 0.07 | 16.94 | 11.10 | 25.08 | 0.95 | 0.62 | 1.53 |
| Togo                 | 29.10 | 23.88 | 35.03 | 0.04 | 0.03 | 0.06 | 12.89 | 9.37  | 17.02 | 0.45 | 0.30 | 0.64 |
| Tonga                | 41.87 | 36.64 | 48.08 | 0.33 | 0.23 | 0.46 | 11.23 | 8.61  | 14.58 | 1.55 | 1.22 | 1.95 |
| Trinidad and Tobago  | 9.55  | 7.92  | 11.26 | 0.02 | 0.01 | 0.02 | 3.17  | 2.60  | 3.78  | 1.57 | 0.99 | 2.06 |
| Tunisia              | 17.24 | 13.95 | 21.31 | 0.11 | 0.07 | 0.15 | 5.20  | 3.79  | 6.91  | 0.54 | 0.34 | 1.06 |
| Turkey               | 31.90 | 27.75 | 35.06 | 0.09 | 0.08 | 0.11 | 2.11  | 1.73  | 2.43  | 0.98 | 0.79 | 1.32 |
| Turkmenistan         | 12.10 | 11.16 | 13.09 | 0.01 | 0.01 | 0.02 | 0.80  | 0.65  | 0.98  | 0.67 | 0.50 | 0.95 |
| Uganda               | 27.02 | 22.54 | 32.68 | 0.30 | 0.19 | 0.50 | 10.04 | 7.24  | 15.05 | 0.80 | 0.28 | 1.72 |
| Ukraine              | 13.14 | 12.32 | 13.96 | 0.09 | 0.08 | 0.10 | 0.35  | 0.32  | 0.39  | 0.57 | 0.44 | 0.87 |
| United Arab Emirates | 31.85 | 26.10 | 39.08 | 0.29 | 0.19 | 0.40 | 9.62  | 6.75  | 12.44 | 1.72 | 0.68 | 4.42 |
| United Kingdom       | 27.50 | 26.37 | 29.38 | 0.31 | 0.29 | 0.34 | 1.06  | 1.00  | 1.14  | 3.93 | 2.16 | 4.80 |
| United States        | 28.96 | 28.10 | 30.03 | 0.19 | 0.17 | 0.20 | 0.86  | 0.82  | 0.91  | 3.50 | 2.48 | 3.87 |
| Uruguay              | 29.22 | 26.44 | 32.06 | 0.06 | 0.05 | 0.07 | 1.93  | 1.68  | 2.23  | 2.17 | 1.59 | 2.59 |
| Uzbekistan           | 15.87 | 14.29 | 17.73 | 0.05 | 0.04 | 0.06 | 4.86  | 4.30  | 5.47  | 2.92 | 2.41 | 3.58 |

|                      |       |       |       |      |      |      |       |       |       |      |      |      |
|----------------------|-------|-------|-------|------|------|------|-------|-------|-------|------|------|------|
| Vanuatu              | 64.34 | 47.90 | 82.63 | 0.28 | 0.17 | 0.50 | 29.08 | 16.96 | 55.41 | 2.14 | 1.24 | 4.24 |
| Venezuela            | 20.04 | 17.67 | 22.69 | 0.03 | 0.03 | 0.04 | 1.23  | 1.05  | 1.43  | 1.29 | 1.01 | 1.61 |
| Vietnam              | 36.00 | 30.28 | 41.29 | 0.03 | 0.02 | 0.04 | 7.25  | 5.70  | 8.78  | 1.39 | 0.88 | 1.88 |
| Virgin Islands, U.S. | 11.87 | 10.13 | 13.41 | 0.11 | 0.09 | 0.13 | 2.31  | 1.96  | 2.68  | 2.71 | 2.18 | 3.31 |
| Yemen                | 28.58 | 21.30 | 37.36 | 0.19 | 0.12 | 0.27 | 17.28 | 9.49  | 23.25 | 0.44 | 0.23 | 0.94 |
| Zambia               | 28.15 | 24.09 | 32.36 | 0.29 | 0.21 | 0.46 | 10.85 | 7.20  | 14.80 | 0.79 | 0.37 | 1.32 |
| Zimbabwe             | 36.19 | 29.71 | 43.52 | 0.10 | 0.07 | 0.13 | 21.42 | 15.34 | 26.62 | 1.11 | 0.68 | 1.50 |

UI, uncertainty interval.

## Supplemental material

### Socio-Demographic Index (SDI) Definitions and Method <sup>11</sup>

The Socio-demographic Index (SDI) is a composite indicator of development status strongly correlated with health outcomes. In short, it is the geometric mean of 0 to 1 indices of total fertility under 25 (TFU25), mean education for those aged 15 and older (EDU15+), and lag distributed income (LDI) per capita.

An index score of 0 represents the minimum level of each covariate input past which selected health outcomes can get no worse, while an index score of 1 represents the maximum level of each covariate input past which selected health outcomes cease to improve. As a composite, a location with an SDI of 0 would have a theoretical minimum level of development relevant to these health outcomes, while a location with an SDI of 1 would have a theoretical maximum level of development relevant to these health outcomes.

The final scales for GBD 2017 are summarized in table below.

| Input          | Lower Bound                         | Upper Bound                |
|----------------|-------------------------------------|----------------------------|
| TFU25          | 0                                   | 3                          |
| LDI per capita | 250 USD (5.52 log USD) <sup>a</sup> | 60,000 USD (11.00 log USD) |
| EDU15+         | 0 years                             | 17 years                   |

<sup>a</sup>The minimum for the LDI scale was originally set at the theoretical limit of 0 USD, as we did not observe an asymptotic relationship between log(LDI) and E<sub>0</sub> or 5q<sub>0</sub> at lower values of log(LDI). Empirically, however, we also did not observe an LDI below 350 USD (5.86 log USD) for the estimation period 1970-2016. In log-space, this meant that approximately half of our scale was not being utilized, compressing the observed variation in LDI and diminishing its meaningful contribution to SDI. Accordingly, we set the lower limit on LDI to 250 USD (5.52 log USD) to ensure we were fully utilizing the range of the scale to capture its variation across space and time, as is the case with the other two inputs.

Using scales described above, we computed the index scores underlying SDI as follows:

$$I_{Cty} = (C_{ty} - C_{low}) / (C_{high} - C_{low})$$

Where  $I_{cly}$  – the index for covariate  $C$ , location  $l$ , and year  $y$  – is equal to the difference between the value of that covariate in that location-year and the lower bound of the covariate divided by the difference between the upper and lower bounds for that covariate. If the values of input covariates fell outside the upper or lower bounds (e.g. LDI per capita greater than 60,000 USD), they were mapped to the respective upper or lower bounds. The index value for TFU25 was computed as  $1 - I_{TFU25ly}$ , as lower TFU25s correspond to higher levels of development, and thus higher index scores. For GBD 2017 we expanded the computation of SDI to 890 national and subnational locations spanning the time period 1950-2017.

The composite SCI was the geometric mean of these three indices for a given location-year. The cutoff values used to determine quintiles for analysis were computed using country-level estimates of SDI for the year 2017, excluding countries with populations less than 1 million.

### **Example Calculation**

Below we present the calculation of SDI for Mexico in the year 2010

$$TFU25 = 1.09; \text{ Mean educ yrs pc} = 8.23; \ln LDI = 9.60$$

$$I_{TFU25} = 1 - \frac{1.09 - 0}{3 - 0} = .637$$

$$I_{Educ} = \frac{8.23 - 0}{17 - 0} = .484$$

$$I_{\ln LDI} = \frac{9.60 - 5.52}{11.00 - 5.52} = .744$$

$$SDI = \sqrt[3]{I_{TFU25} * I_{Educ} * I_{\ln LDI}} = \sqrt[3]{.637 * .484 * .744} = .611$$

**The SDI values by location in 2017 are provided in table below**

| Location ID | Location Name                                    | SDI Index Value | SDI Quintile    |
|-------------|--------------------------------------------------|-----------------|-----------------|
| 1           | Global                                           | 0.652           |                 |
| 31          | Central Europe, Eastern Europe, and Central Asia | 0.766           |                 |
| 32          | Central Asia                                     | 0.673           |                 |
| 33          | Armenia                                          | 0.702           | High-middle SDI |
| 34          | Azerbaijan                                       | 0.701           | High-middle SDI |
| 35          | Georgia                                          | 0.700           | High-middle SDI |
| 36          | Kazakhstan                                       | 0.735           | High-middle SDI |
| 37          | Kyrgyzstan                                       | 0.607           | Low-middle SDI  |
| 38          | Mongolia                                         | 0.662           | Middle SDI      |
| 39          | Tajikistan                                       | 0.523           | Low-middle SDI  |
| 40          | Turkmenistan                                     | 0.696           | Middle SDI      |
| 41          | Uzbekistan                                       | 0.630           | Middle SDI      |
| 42          | Central Europe                                   | 0.814           |                 |
| 43          | Albania                                          | 0.685           | Middle SDI      |
| 44          | Bosnia and Herzegovina                           | 0.713           | High-middle SDI |
| 45          | Bulgaria                                         | 0.792           | High-middle SDI |
| 46          | Croatia                                          | 0.825           | High SDI        |
| 47          | Czech Republic                                   | 0.851           | High SDI        |
| 48          | Hungary                                          | 0.817           | High-middle SDI |
| 49          | Macedonia                                        | 0.754           | High-middle SDI |
| 50          | Montenegro                                       | 0.788           | High-middle SDI |
| 51          | Poland                                           | 0.844           | High SDI        |
| 52          | Romania                                          | 0.784           | High-middle SDI |
| 53          | Serbia                                           | 0.752           | High-middle SDI |

|       |                          |       |                 |
|-------|--------------------------|-------|-----------------|
| 54    | Slovakia                 | 0.842 | High SDI        |
| 55    | Slovenia                 | 0.860 | High SDI        |
| 56    | Eastern Europe           | 0.785 |                 |
| 57    | Belarus                  | 0.773 | High-middle SDI |
| 58    | Estonia                  | 0.858 | High SDI        |
| 59    | Latvia                   | 0.825 | High SDI        |
| 60    | Lithuania                | 0.841 | High SDI        |
| 61    | Moldova                  | 0.676 | Middle SDI      |
| 62    | Russian Federation       | 0.792 | High-middle SDI |
| 63    | Ukraine                  | 0.740 | High-middle SDI |
| 64    | High-income              | 0.854 |                 |
| 70    | Australasia              | 0.869 |                 |
| 71    | Australia                | 0.873 | High SDI        |
| 72    | New Zealand              | 0.842 | High SDI        |
| 65    | High-income Asia Pacific | 0.869 |                 |
| 66    | Brunei                   | 0.856 | High SDI        |
| 67    | Japan                    | 0.865 | High SDI        |
| 35446 | Aichi                    | 0.875 | High SDI        |
| 35428 | Akita                    | 0.829 | High SDI        |
| 35425 | Aomori                   | 0.825 | High SDI        |
| 35435 | Chiba                    | 0.859 | High SDI        |
| 35461 | Ehime                    | 0.838 | High SDI        |
| 35441 | Fukui                    | 0.852 | High SDI        |
| 35463 | Fukuoka                  | 0.855 | High SDI        |
| 35430 | Fukushima                | 0.831 | High SDI        |



|       |           |       |          |
|-------|-----------|-------|----------|
| 35444 | Gifu      | 0.849 | High SDI |
| 35433 | Gunma     | 0.851 | High SDI |
| 35457 | Hiroshima | 0.863 | High SDI |
| 35424 | Hokkaido  | 0.842 | High SDI |
| 35451 | Hyogo     | 0.860 | High SDI |
| 35431 | Ibaraki   | 0.851 | High SDI |
| 35440 | Ishikawa  | 0.856 | High SDI |
| 35426 | Iwate     | 0.825 | High SDI |
| 35460 | Kagawa    | 0.850 | High SDI |
| 35469 | Kagoshima | 0.830 | High SDI |
| 35437 | Kanagawa  | 0.875 | High SDI |
| 35462 | Kochi     | 0.825 | High SDI |
| 35466 | Kumamoto  | 0.832 | High SDI |
| 35449 | Kyoto     | 0.873 | High SDI |
| 35447 | Mie       | 0.854 | High SDI |
| 35427 | Miyagi    | 0.850 | High SDI |
| 35468 | Miyazaki  | 0.823 | High SDI |
| 35443 | Nagano    | 0.851 | High SDI |
| 35465 | Nagasaki  | 0.826 | High SDI |
| 35452 | Nara      | 0.848 | High SDI |
| 35438 | Niigata   | 0.843 | High SDI |
| 35467 | Oita      | 0.846 | High SDI |
| 35456 | Okayama   | 0.856 | High SDI |
| 35470 | Okinawa   | 0.818 | High SDI |
| 35450 | Osaka     | 0.872 | High SDI |

|       |                           |       |                 |
|-------|---------------------------|-------|-----------------|
| 35464 | Saga                      | 0.834 | High SDI        |
| 35434 | Saitama                   | 0.852 | High SDI        |
| 35448 | Shiga                     | 0.871 | High SDI        |
| 35455 | Shimane                   | 0.831 | High SDI        |
| 35445 | Shizuoka                  | 0.859 | High SDI        |
| 35432 | Tochigi                   | 0.853 | High SDI        |
| 35459 | Tokushima                 | 0.845 | High SDI        |
| 35436 | Tokyo                     | 0.924 | High SDI        |
| 35454 | Tottori                   | 0.834 | High SDI        |
| 35439 | Toyama                    | 0.860 | High SDI        |
| 35453 | Wakayama                  | 0.840 | High SDI        |
| 35429 | Yamagata                  | 0.832 | High SDI        |
| 35458 | Yamaguchi                 | 0.849 | High SDI        |
| 35442 | Yamanashi                 | 0.854 | High SDI        |
| 68    | South Korea               | 0.872 | High SDI        |
| 69    | Singapore                 | 0.872 | High SDI        |
| 100   | High-income North America | 0.868 |                 |
| 101   | Canada                    | 0.882 | High SDI        |
| 349   | Greenland                 | 0.760 | High-middle SDI |
| 102   | United States             | 0.867 | High SDI        |
| 523   | Alabama                   | 0.837 | High SDI        |
| 524   | Alaska                    | 0.861 | High SDI        |
| 525   | Arizona                   | 0.845 | High SDI        |
| 526   | Arkansas                  | 0.826 | High SDI        |
| 527   | California                | 0.872 | High SDI        |

|     |                      |       |          |
|-----|----------------------|-------|----------|
| 528 | Colorado             | 0.882 | High SDI |
| 529 | Connecticut          | 0.906 | High SDI |
| 530 | Delaware             | 0.874 | High SDI |
| 531 | District of Columbia | 0.890 | High SDI |
| 532 | Florida              | 0.864 | High SDI |
| 533 | Georgia              | 0.848 | High SDI |
| 534 | Hawaii               | 0.872 | High SDI |
| 535 | Idaho                | 0.841 | High SDI |
| 536 | Illinois             | 0.879 | High SDI |
| 537 | Indiana              | 0.848 | High SDI |
| 538 | Iowa                 | 0.870 | High SDI |
| 539 | Kansas               | 0.864 | High SDI |
| 540 | Kentucky             | 0.831 | High SDI |
| 541 | Louisiana            | 0.835 | High SDI |
| 542 | Maine                | 0.872 | High SDI |
| 543 | Maryland             | 0.896 | High SDI |
| 544 | Massachusetts        | 0.913 | High SDI |
| 545 | Michigan             | 0.868 | High SDI |
| 546 | Minnesota            | 0.893 | High SDI |
| 547 | Mississippi          | 0.819 | High SDI |
| 548 | Missouri             | 0.853 | High SDI |
| 549 | Montana              | 0.863 | High SDI |
| 550 | Nebraska             | 0.873 | High SDI |
| 551 | Nevada               | 0.847 | High SDI |
| 552 | New Hampshire        | 0.904 | High SDI |

|     |                        |       |                 |
|-----|------------------------|-------|-----------------|
| 553 | New Jersey             | 0.899 | High SDI        |
| 554 | New Mexico             | 0.835 | High SDI        |
| 555 | New York               | 0.893 | High SDI        |
| 556 | North Carolina         | 0.850 | High SDI        |
| 557 | North Dakota           | 0.880 | High SDI        |
| 558 | Ohio                   | 0.858 | High SDI        |
| 559 | Oklahoma               | 0.838 | High SDI        |
| 560 | Oregon                 | 0.871 | High SDI        |
| 561 | Pennsylvania           | 0.879 | High SDI        |
| 562 | Rhode Island           | 0.890 | High SDI        |
| 563 | South Carolina         | 0.846 | High SDI        |
| 564 | South Dakota           | 0.860 | High SDI        |
| 565 | Tennessee              | 0.837 | High SDI        |
| 566 | Texas                  | 0.838 | High SDI        |
| 567 | Utah                   | 0.856 | High SDI        |
| 568 | Vermont                | 0.896 | High SDI        |
| 569 | Virginia               | 0.885 | High SDI        |
| 570 | Washington             | 0.884 | High SDI        |
| 571 | West Virginia          | 0.825 | High SDI        |
| 572 | Wisconsin              | 0.878 | High SDI        |
| 573 | Wyoming                | 0.869 | High SDI        |
| 96  | Southern Latin America | 0.720 |                 |
| 97  | Argentina              | 0.710 | High-middle SDI |
| 98  | Chile                  | 0.748 | High-middle SDI |
| 99  | Uruguay                | 0.707 | High-middle SDI |

|      |                         |       |                 |
|------|-------------------------|-------|-----------------|
| 73   | Western Europe          | 0.857 |                 |
| 74   | Andorra                 | 0.902 | High SDI        |
| 75   | Austria                 | 0.866 | High SDI        |
| 76   | Belgium                 | 0.886 | High SDI        |
| 77   | Cyprus                  | 0.865 | High SDI        |
| 78   | Denmark                 | 0.918 | High SDI        |
| 79   | Finland                 | 0.893 | High SDI        |
| 80   | France                  | 0.865 | High SDI        |
| 81   | Germany                 | 0.870 | High SDI        |
| 82   | Greece                  | 0.817 | High SDI        |
| 83   | Iceland                 | 0.907 | High SDI        |
| 84   | Ireland                 | 0.882 | High SDI        |
| 85   | Israel                  | 0.816 | High-middle SDI |
| 86   | Italy                   | 0.843 | High SDI        |
| 87   | Luxembourg              | 0.916 | High SDI        |
| 88   | Malta                   | 0.836 | High SDI        |
| 89   | Netherlands             | 0.912 | High SDI        |
| 90   | Norway                  | 0.911 | High SDI        |
| 91   | Portugal                | 0.778 | High-middle SDI |
| 92   | Spain                   | 0.825 | High SDI        |
| 93   | Sweden                  | 0.883 | High SDI        |
| 4944 | Stockholm               | 0.914 | High SDI        |
| 4940 | Sweden except Stockholm | 0.873 | High SDI        |
| 94   | Switzerland             | 0.889 | High SDI        |
| 95   | United Kingdom          | 0.843 | High SDI        |

|      |                             |       |                 |
|------|-----------------------------|-------|-----------------|
| 4749 | England                     | 0.849 | High SDI        |
| 4621 | East Midlands               | 0.830 | High SDI        |
| 4623 | East of England             | 0.840 | High SDI        |
| 4624 | Greater London              | 0.894 | High SDI        |
| 4618 | North East England          | 0.821 | High SDI        |
| 4619 | North West England          | 0.834 | High SDI        |
| 4625 | South East England          | 0.856 | High SDI        |
| 4626 | South West England          | 0.841 | High SDI        |
| 4622 | West Midlands               | 0.829 | High SDI        |
| 4620 | Yorkshire and the Humber    | 0.830 | High SDI        |
| 433  | Northern Ireland            | 0.835 | High SDI        |
| 434  | Scotland                    | 0.805 | High SDI        |
| 4636 | Wales                       | 0.806 | High SDI        |
| 103  | Latin America and Caribbean | 0.640 |                 |
| 120  | Andean Latin America        | 0.628 |                 |
| 121  | Bolivia                     | 0.587 | Low-middle SDI  |
| 122  | Ecuador                     | 0.636 | Middle SDI      |
| 123  | Peru                        | 0.636 | Middle SDI      |
| 104  | Caribbean                   | 0.638 |                 |
| 105  | Antigua and Barbuda         | 0.715 | High-middle SDI |
| 106  | The Bahamas                 | 0.756 | High-middle SDI |
| 107  | Barbados                    | 0.739 | High-middle SDI |
| 108  | Belize                      | 0.602 | Low-middle SDI  |
| 305  | Bermuda                     | 0.805 | High-middle SDI |
| 109  | Cuba                        | 0.688 | Middle SDI      |

|      |                                  |       |                 |
|------|----------------------------------|-------|-----------------|
| 110  | Dominica                         | 0.687 | Middle SDI      |
| 111  | Dominican Republic               | 0.593 | Low-middle SDI  |
| 112  | Grenada                          | 0.640 | Middle SDI      |
| 113  | Guyana                           | 0.584 | Low-middle SDI  |
| 114  | Haiti                            | 0.442 | Low SDI         |
| 115  | Jamaica                          | 0.679 | Middle SDI      |
| 385  | Puerto Rico                      | 0.813 | High-middle SDI |
| 116  | Saint Lucia                      | 0.653 | Middle SDI      |
| 117  | Saint Vincent and the Grenadines | 0.608 | Middle SDI      |
| 118  | Suriname                         | 0.641 | Middle SDI      |
| 119  | Trinidad and Tobago              | 0.698 | Middle SDI      |
| 422  | Virgin Islands, U.S.             | 0.807 | High-middle SDI |
| 124  | Central Latin America            | 0.623 |                 |
| 125  | Colombia                         | 0.634 | Middle SDI      |
| 126  | Costa Rica                       | 0.662 | Middle SDI      |
| 127  | El Salvador                      | 0.593 | Low-middle SDI  |
| 128  | Guatemala                        | 0.524 | Low-middle SDI  |
| 129  | Honduras                         | 0.512 | Low-middle SDI  |
| 130  | Mexico                           | 0.628 | Middle SDI      |
| 4643 | Aguascalientes                   | 0.659 | Middle SDI      |
| 4644 | Baja California                  | 0.657 | Middle SDI      |
| 4645 | Baja California Sur              | 0.659 | Middle SDI      |
| 4646 | Campeche                         | 0.616 | Middle SDI      |
| 4649 | Chiapas                          | 0.533 | Middle SDI      |
| 4650 | Chihuahua                        | 0.639 | Middle SDI      |

|      |                                 |       |            |
|------|---------------------------------|-------|------------|
| 4647 | Coahuila                        | 0.645 | Middle SDI |
| 4648 | Colima                          | 0.654 | Middle SDI |
| 4652 | Durango                         | 0.624 | Middle SDI |
| 4653 | Guanajuato                      | 0.621 | Middle SDI |
| 4654 | Guerrero                        | 0.562 | Middle SDI |
| 4655 | Hidalgo                         | 0.587 | Middle SDI |
| 4656 | Jalisco                         | 0.649 | Middle SDI |
| 4657 | Mexico                          | 0.635 | Middle SDI |
| 4651 | Mexico City                     | 0.716 | Middle SDI |
| 4658 | Michoacan de Ocampo             | 0.586 | Middle SDI |
| 4659 | Morelos                         | 0.635 | Middle SDI |
| 4660 | Nayarit                         | 0.620 | Middle SDI |
| 4661 | Nuevo Leon                      | 0.677 | Middle SDI |
| 4662 | Oaxaca                          | 0.561 | Middle SDI |
| 4663 | Puebla                          | 0.584 | Middle SDI |
| 4664 | Queretaro                       | 0.639 | Middle SDI |
| 4665 | Quintana Roo                    | 0.626 | Middle SDI |
| 4666 | San Luis Potosi                 | 0.621 | Middle SDI |
| 4667 | Sinaloa                         | 0.649 | Middle SDI |
| 4668 | Sonora                          | 0.650 | Middle SDI |
| 4669 | Tabasco                         | 0.611 | Middle SDI |
| 4670 | Tamaulipas                      | 0.647 | Middle SDI |
| 4671 | Tlaxcala                        | 0.604 | Middle SDI |
| 4672 | Veracruz de Ignacio de la Llave | 0.592 | Middle SDI |
| 4673 | Yucatan                         | 0.630 | Middle SDI |



|      |                        |       |                 |
|------|------------------------|-------|-----------------|
| 4674 | Zacatecas              | 0.608 | Middle SDI      |
| 131  | Nicaragua              | 0.530 | Low-middle SDI  |
| 132  | Panama                 | 0.677 | Middle SDI      |
| 133  | Venezuela              | 0.655 | Middle SDI      |
| 134  | Tropical Latin America | 0.662 |                 |
| 135  | Brazil                 | 0.663 | Middle SDI      |
| 4750 | Acre                   | 0.602 | Low-middle SDI  |
| 4751 | Alagoas                | 0.556 | Low-middle SDI  |
| 4753 | Amapa                  | 0.659 | Middle SDI      |
| 4752 | Amazonas               | 0.629 | Middle SDI      |
| 4754 | Bahia                  | 0.591 | Low-middle SDI  |
| 4755 | Ceara                  | 0.600 | Low-middle SDI  |
| 4756 | Distrito Federal       | 0.792 | High-middle SDI |
| 4757 | Espirito Santo         | 0.677 | Middle SDI      |
| 4758 | Goiias                 | 0.650 | Middle SDI      |
| 4759 | Maranhao               | 0.507 | Low-middle SDI  |
| 4762 | Mato Grosso            | 0.662 | Middle SDI      |
| 4761 | Mato Grosso do Sul     | 0.650 | Middle SDI      |
| 4760 | Minas Gerais           | 0.661 | Middle SDI      |
| 4763 | Para                   | 0.579 | Low-middle SDI  |
| 4764 | Paraiba                | 0.574 | Low-middle SDI  |
| 4765 | Parana                 | 0.682 | Middle SDI      |
| 4766 | Pernambuco             | 0.594 | Low-middle SDI  |
| 4767 | Piaui                  | 0.552 | Low-middle SDI  |
| 4768 | Rio de Janeiro         | 0.709 | High-middle SDI |

|      |                              |       |                 |
|------|------------------------------|-------|-----------------|
| 4769 | Rio Grande do Norte          | 0.605 | Low-middle SDI  |
| 4772 | Rio Grande do Sul            | 0.693 | Middle SDI      |
| 4770 | Rondonia                     | 0.622 | Middle SDI      |
| 4771 | Roraima                      | 0.646 | Middle SDI      |
| 4773 | Santa Catarina               | 0.702 | High-middle SDI |
| 4775 | Sao Paulo                    | 0.720 | High-middle SDI |
| 4774 | Sergipe                      | 0.616 | Middle SDI      |
| 4776 | Tocantins                    | 0.611 | Middle SDI      |
| 136  | Paraguay                     | 0.619 | Middle SDI      |
| 137  | North Africa and Middle East | 0.639 |                 |
| 138  | North Africa and Middle East | 0.639 |                 |
| 160  | Afghanistan                  | 0.290 | Low SDI         |
| 139  | Algeria                      | 0.696 | Middle SDI      |
| 140  | Bahrain                      | 0.712 | High-middle SDI |
| 141  | Egypt                        | 0.604 | Low-middle SDI  |
| 142  | Iran                         | 0.700 | High-middle SDI |
| 143  | Iraq                         | 0.585 | Low-middle SDI  |
| 144  | Jordan                       | 0.697 | Middle SDI      |
| 145  | Kuwait                       | 0.786 | High-middle SDI |
| 146  | Lebanon                      | 0.730 | High-middle SDI |
| 147  | Libya                        | 0.761 | High-middle SDI |
| 148  | Morocco                      | 0.579 | Low-middle SDI  |
| 149  | Palestine                    | 0.541 | Low-middle SDI  |
| 150  | Oman                         | 0.744 | High-middle SDI |
| 151  | Qatar                        | 0.766 | High-middle SDI |

|     |                                        |       |                 |
|-----|----------------------------------------|-------|-----------------|
| 152 | Saudi Arabia                           | 0.779 | High-middle SDI |
| 522 | Sudan                                  | 0.478 | Low-middle SDI  |
| 153 | Syria                                  | 0.611 | Middle SDI      |
| 154 | Tunisia                                | 0.675 | Middle SDI      |
| 155 | Turkey                                 | 0.729 | High-middle SDI |
| 156 | United Arab Emirates                   | 0.795 | High-middle SDI |
| 157 | Yemen                                  | 0.430 | Low SDI         |
| 158 | South Asia                             | 0.534 |                 |
| 159 | South Asia                             | 0.534 |                 |
| 161 | Bangladesh                             | 0.458 | Low SDI         |
| 162 | Bhutan                                 | 0.570 | Low-middle SDI  |
| 163 | India                                  | 0.550 | Low-middle SDI  |
| 164 | Nepal                                  | 0.429 | Low SDI         |
| 165 | Pakistan                               | 0.492 | Low-middle SDI  |
| 4   | Southeast Asia, East Asia, and Oceania | 0.685 |                 |
| 5   | East Asia                              | 0.709 |                 |
| 6   | China                                  | 0.707 | High-middle SDI |
| 7   | North Korea                            | 0.538 | Low-middle SDI  |
| 8   | Taiwan                                 | 0.864 | High SDI        |
| 21  | Oceania                                | 0.471 |                 |
| 298 | American Samoa                         | 0.702 | High-middle SDI |
| 25  | Federated States of Micronesia         | 0.575 | Low-middle SDI  |
| 22  | Fiji                                   | 0.641 | Middle SDI      |
| 351 | Guam                                   | 0.794 | High-middle SDI |
| 23  | Kiribati                               | 0.427 | Low SDI         |

|      |                          |       |                 |
|------|--------------------------|-------|-----------------|
| 24   | Marshall Islands         | 0.550 | Low-middle SDI  |
| 376  | Northern Mariana Islands | 0.758 | High-middle SDI |
| 26   | Papua New Guinea         | 0.419 | Low SDI         |
| 27   | Samoa                    | 0.576 | Low-middle SDI  |
| 28   | Solomon Islands          | 0.425 | Low SDI         |
| 29   | Tonga                    | 0.625 | Middle SDI      |
| 30   | Vanuatu                  | 0.475 | Low-middle SDI  |
| 9    | Southeast Asia           | 0.641 |                 |
| 10   | Cambodia                 | 0.482 | Low-middle SDI  |
| 11   | Indonesia                | 0.648 | Middle SDI      |
| 4709 | Aceh                     | 0.640 | Middle SDI      |
| 4726 | Bali                     | 0.647 | Middle SDI      |
| 4717 | Bangka-Belitung Islands  | 0.637 | Middle SDI      |
| 4725 | Banten                   | 0.636 | Middle SDI      |
| 4715 | Bengkulu                 | 0.606 | Low-middle SDI  |
| 4737 | Gorontalo                | 0.557 | Low-middle SDI  |
| 4720 | Jakarta                  | 0.795 | High-middle SDI |
| 4713 | Jambi                    | 0.641 | Middle SDI      |
| 4721 | West Java                | 0.636 | Middle SDI      |
| 4722 | Central Java             | 0.607 | Middle SDI      |
| 4724 | East Java                | 0.642 | Middle SDI      |
| 4729 | West Kalimantan          | 0.589 | Low-middle SDI  |
| 4731 | South Kalimantan         | 0.624 | Middle SDI      |
| 4730 | Central Kalimantan       | 0.642 | Middle SDI      |
| 4732 | East Kalimantan          | 0.747 | High-middle SDI |

|      |                    |       |                 |
|------|--------------------|-------|-----------------|
| 4719 | North Kalimantan   | 0.756 | High-middle SDI |
| 4718 | Riau Islands       | 0.728 | High-middle SDI |
| 4716 | Lampung            | 0.616 | Middle SDI      |
| 4739 | Maluku             | 0.556 | Low-middle SDI  |
| 4740 | North Maluku       | 0.546 | Low-middle SDI  |
| 4727 | West Nusa Tenggara | 0.557 | Low-middle SDI  |
| 4728 | East Nusa Tenggara | 0.519 | Low-middle SDI  |
| 4742 | Papua              | 0.588 | Low-middle SDI  |
| 4741 | West Papua         | 0.683 | Middle SDI      |
| 4712 | Riau               | 0.714 | High-middle SDI |
| 4738 | West Sulawesi      | 0.559 | Low-middle SDI  |
| 4735 | South Sulawesi     | 0.611 | Middle SDI      |
| 4734 | Central Sulawesi   | 0.612 | Middle SDI      |
| 4736 | Southeast Sulawesi | 0.596 | Low-middle SDI  |
| 4733 | North Sulawesi     | 0.652 | Middle SDI      |
| 4711 | West Sumatra       | 0.641 | Middle SDI      |
| 4714 | South Sumatra      | 0.642 | Middle SDI      |
| 4710 | North Sumatra      | 0.653 | Middle SDI      |
| 4723 | Yogyakarta         | 0.650 | Middle SDI      |
| 12   | Laos               | 0.519 | Low-middle SDI  |
| 13   | Malaysia           | 0.759 | High-middle SDI |
| 14   | Maldives           | 0.655 | Middle SDI      |
| 183  | Mauritius          | 0.720 | High-middle SDI |
| 15   | Myanmar            | 0.556 | Low-middle SDI  |
| 16   | Philippines        | 0.617 | Middle SDI      |

|     |                                  |       |                |
|-----|----------------------------------|-------|----------------|
| 17  | Sri Lanka                        | 0.680 | Middle SDI     |
| 186 | Seychelles                       | 0.692 | Middle SDI     |
| 18  | Thailand                         | 0.684 | Middle SDI     |
| 19  | Timor-Leste                      | 0.505 | Low-middle SDI |
| 20  | Vietnam                          | 0.607 | Middle SDI     |
| 166 | Sub-Saharan Africa               | 0.446 |                |
| 167 | Central Sub-Saharan Africa       | 0.457 |                |
| 168 | Angola                           | 0.461 | Low-middle SDI |
| 169 | Central African Republic         | 0.334 | Low SDI        |
| 170 | Congo                            | 0.574 | Low-middle SDI |
| 171 | Democratic Republic of the Congo | 0.364 | Low SDI        |
| 172 | Equatorial Guinea                | 0.625 | Middle SDI     |
| 173 | Gabon                            | 0.651 | Middle SDI     |
| 174 | Eastern Sub-Saharan Africa       | 0.387 |                |
| 175 | Burundi                          | 0.310 | Low SDI        |
| 176 | Comoros                          | 0.434 | Low SDI        |
| 177 | Djibouti                         | 0.485 | Low-middle SDI |
| 178 | Eritrea                          | 0.409 | Low SDI        |
| 179 | Ethiopia                         | 0.334 | Low SDI        |
| 180 | Kenya                            | 0.499 | Low-middle SDI |
| 181 | Madagascar                       | 0.331 | Low SDI        |
| 182 | Malawi                           | 0.349 | Low SDI        |
| 184 | Mozambique                       | 0.340 | Low SDI        |
| 185 | Rwanda                           | 0.407 | Low SDI        |
| 187 | Somalia                          | 0.235 | Low SDI        |

|     |                             |       |                |
|-----|-----------------------------|-------|----------------|
| 435 | South Sudan                 | 0.275 | Low SDI        |
| 189 | Tanzania                    | 0.412 | Low SDI        |
| 190 | Uganda                      | 0.388 | Low SDI        |
| 191 | Zambia                      | 0.472 | Low-middle SDI |
| 192 | Southern Sub-Saharan Africa | 0.640 |                |
| 193 | Botswana                    | 0.663 | Middle SDI     |
| 194 | Lesotho                     | 0.493 | Low-middle SDI |
| 195 | Namibia                     | 0.616 | Middle SDI     |
| 196 | South Africa                | 0.677 | Middle SDI     |
| 197 | Swaziland                   | 0.578 | Low-middle SDI |
| 198 | Zimbabwe                    | 0.463 | Low-middle SDI |
| 199 | Western Sub-Saharan Africa  | 0.441 |                |
| 200 | Benin                       | 0.373 | Low SDI        |
| 201 | Burkina Faso                | 0.284 | Low SDI        |
| 202 | Cameroon                    | 0.482 | Low-middle SDI |
| 203 | Cape Verde                  | 0.549 | Low-middle SDI |
| 204 | Chad                        | 0.253 | Low SDI        |
| 205 | Cote d'Ivoire               | 0.412 | Low SDI        |
| 206 | The Gambia                  | 0.405 | Low SDI        |
| 207 | Ghana                       | 0.537 | Low-middle SDI |
| 208 | Guinea                      | 0.325 | Low SDI        |
| 209 | Guinea-Bissau               | 0.349 | Low SDI        |
| 210 | Liberia                     | 0.328 | Low SDI        |
| 211 | Mali                        | 0.267 | Low SDI        |
| 212 | Mauritania                  | 0.471 | Low-middle SDI |

|     |                       |       |                |
|-----|-----------------------|-------|----------------|
| 213 | Niger                 | 0.191 | Low SDI        |
| 214 | Nigeria               | 0.493 | Low-middle SDI |
| 215 | Sao Tome and Principe | 0.488 | Low-middle SDI |
| 216 | Senegal               | 0.373 | Low SDI        |
| 217 | Sierra Leone          | 0.357 | Low SDI        |
| 218 | Togo                  | 0.413 | Low SDI        |

### Reference

1. Global, regional, and national disability-adjusted life-years (DALYs) for 333 diseases and injuries and healthy life expectancy (HALE) for 195 countries and territories, 1990-2016: a systematic analysis for the Global Burden of Disease Study 2016. *Lancet* 2017;390(10100):1260-344.
